# Supplementary material for: In situ carbon isotope analysis of diamonds using LA-MC-ICP-MS inspired by the distribution of ions and isotope ratios in ICP
Source: Royal Society of Chemistry journal article supplement (doi:10.1039/d4ja00354c), 2024-12-11
Supplement: d4ja00354c2.xlsx [file d4ja00354c2.xlsx]

## Sheet: Sheet1
Z Axis	X Axis	12C+	13C+	40Ar3+	13C+/12C+	40Ar3+/12C+	40Ar3+/13C+
5	-4.9029	0.62	0.00881	0.285	0.0142097	0.459677	32.3496
5	-4.89077	0.621	0.00878	0.285	0.0141385	0.458937	32.4601
5	-4.87869	0.622	0.0088	0.285	0.0141479	0.458199	32.3864
5	-4.86657	0.621	0.00866	0.286	0.0139452	0.460548	33.0254
5	-4.85448	0.621	0.00879	0.286	0.0141546	0.460548	32.537
5	-4.84236	0.623	0.00867	0.285	0.0139165	0.457464	32.872
5	-4.83023	0.622	0.0087	0.285	0.0139871	0.458199	32.7586
5	-4.81815	0.622	0.00869	0.284	0.0139711	0.456592	32.6812
5	-4.80607	0.623	0.00872	0.285	0.0139968	0.457464	32.6835
5	-4.79394	0.621	0.00869	0.285	0.0139936	0.458937	32.7963
5	-4.78181	0.623	0.00892	0.285	0.0143178	0.457464	31.9507
5	-4.76973	0.622	0.00858	0.284	0.0137942	0.456592	33.1002
5	-4.75761	0.625	0.00872	0.284	0.013952	0.4544	32.5688
5	-4.74548	0.623	0.00879	0.284	0.0141091	0.455859	32.3094
5	-4.7334	0.623	0.00872	0.285	0.0139968	0.457464	32.6835
5	-4.72132	0.624	0.00871	0.285	0.0139583	0.456731	32.721
5	-4.70919	0.624	0.00871	0.284	0.0139583	0.455128	32.6062
5	-4.69706	0.626	0.00863	0.283	0.0137859	0.452077	32.7926
5	-4.68498	0.631	0.00877	0.284	0.0138986	0.450079	32.3831
5	-4.67285	0.637	0.00892	0.283	0.0140031	0.44427	31.7265
5	-4.66077	0.643	0.00898	0.284	0.0139658	0.44168	31.6258
5	-4.64865	0.649	0.00906	0.284	0.0139599	0.437596	31.3466
5	-4.63656	0.661	0.00933	0.284	0.014115	0.429652	30.4394
5	-4.62444	0.669	0.00949	0.284	0.0141854	0.424514	29.9262
5	-4.61231	0.679	0.00938	0.283	0.0138144	0.416789	30.1706
5	-4.60027	0.686	0.00956	0.285	0.0139359	0.415452	29.8117
5	-4.58815	0.696	0.00974	0.284	0.0139943	0.408046	29.1581
5	-4.57602	0.704	0.00982	0.284	0.0139489	0.403409	28.9206
5	-4.56394	0.716	0.00993	0.285	0.0138687	0.398045	28.7009
5	-4.55181	0.726	0.01	0.286	0.0137741	0.393939	28.6
5	-4.53973	0.733	0.0104	0.285	0.0141883	0.388813	27.4038
5	-4.5276	0.741	0.0103	0.283	0.0139001	0.381916	27.4757
5	-4.51548	0.75	0.0103	0.284	0.0137333	0.378667	27.5728
5	-4.5034	0.758	0.0104	0.285	0.0137203	0.375989	27.4038
5	-4.49127	0.772	0.0108	0.285	0.0139896	0.369171	26.3889
5	-4.47919	0.775	0.0107	0.285	0.0138065	0.367742	26.6355
5	-4.46711	0.776	0.0109	0.284	0.0140464	0.365979	26.055
5	-4.45498	0.787	0.0109	0.284	0.0138501	0.360864	26.055
5	-4.44285	0.795	0.011	0.284	0.0138365	0.357233	25.8182
5	-4.43073	0.797	0.011	0.284	0.0138018	0.356336	25.8182
5	-4.41864	0.807	0.0112	0.287	0.0138786	0.355638	25.625
5	-4.40656	0.818	0.0112	0.285	0.0136919	0.348411	25.4464
5	-4.39444	0.821	0.0113	0.285	0.0137637	0.347138	25.2212
5	-4.38231	0.822	0.0116	0.286	0.0141119	0.347932	24.6552
5	-4.37023	0.83	0.0116	0.284	0.0139759	0.342169	24.4828
5	-4.3581	0.84	0.0116	0.285	0.0138095	0.339286	24.569
5	-4.34602	0.847	0.0119	0.283	0.0140496	0.33412	23.7815
5	-4.33394	0.851	0.0117	0.284	0.0137485	0.333725	24.2735
5	-4.32181	0.859	0.0118	0.286	0.0137369	0.332945	24.2373
5	-4.30969	0.872	0.0122	0.286	0.0139908	0.327982	23.4426
5	-4.2976	0.882	0.0124	0.286	0.014059	0.324263	23.0645
5	-4.28552	0.887	0.0122	0.285	0.0137542	0.321308	23.3607
5	-4.27335	0.899	0.0123	0.284	0.0136819	0.315907	23.0894
5	-4.26127	0.909	0.0126	0.284	0.0138614	0.312431	22.5397
5	-4.24919	0.914	0.0127	0.283	0.013895	0.309628	22.2835
5	-4.23706	0.93	0.0129	0.283	0.013871	0.304301	21.938
5	-4.22498	0.937	0.0129	0.284	0.0137673	0.303095	22.0155
5	-4.21285	0.936	0.013	0.285	0.0138889	0.304487	21.9231
5	-4.20077	0.939	0.0131	0.283	0.013951	0.301384	21.6031
5	-4.18864	0.946	0.013	0.285	0.0137421	0.301268	21.9231
5	-4.17652	0.956	0.0132	0.283	0.0138075	0.296025	21.4394
5	-4.16444	0.971	0.0134	0.284	0.0138002	0.292482	21.194
5	-4.15235	0.988	0.0137	0.284	0.0138664	0.287449	20.7299
5	-4.14023	1	0.0136	0.284	0.0136	0.284	20.8824
5	-4.12814	1.01	0.0139	0.284	0.0137624	0.281188	20.4317
5	-4.11602	1.03	0.0141	0.286	0.0136893	0.27767	20.2837
5	-4.10389	1.04	0.0143	0.285	0.01375	0.274038	19.9301
5	-4.09177	1.05	0.0145	0.283	0.0138095	0.269524	19.5172
5	-4.07968	1.06	0.0144	0.284	0.0135849	0.267925	19.7222
5	-4.0676	1.05	0.0143	0.285	0.013619	0.271429	19.9301
5	-4.05548	1.06	0.0146	0.285	0.0137736	0.268868	19.5205
5	-4.04339	1.07	0.0147	0.286	0.0137383	0.26729	19.4558
5	-4.03127	1.07	0.0147	0.284	0.0137383	0.265421	19.3197
5	-4.01914	1.09	0.0149	0.285	0.0136697	0.261468	19.1275
5	-4.00706	1.1	0.0151	0.284	0.0137273	0.258182	18.8079
5	-3.99493	1.12	0.0153	0.284	0.0136607	0.253571	18.5621
5	-3.98285	1.13	0.0153	0.282	0.0135398	0.249558	18.4314
5	-3.97072	1.15	0.0157	0.283	0.0136522	0.246087	18.0255
5	-3.95864	1.16	0.016	0.283	0.0137931	0.243966	17.6875
5	-3.94652	1.17	0.016	0.284	0.0136752	0.242735	17.75
5	-3.93439	1.17	0.0161	0.283	0.0137607	0.24188	17.5776
5	-3.92231	1.19	0.0164	0.282	0.0137815	0.236975	17.1951
5	-3.91023	1.21	0.0164	0.283	0.0135537	0.233884	17.2561
5	-3.8981	1.22	0.0167	0.283	0.0136885	0.231967	16.9461
5	-3.88602	1.24	0.0169	0.285	0.013629	0.229839	16.8639
5	-3.87389	1.26	0.0173	0.282	0.0137302	0.22381	16.3006
5	-3.86176	1.27	0.0172	0.282	0.0135433	0.222047	16.3953
5	-3.84968	1.28	0.0175	0.284	0.0136719	0.221875	16.2286
5	-3.83756	1.31	0.0177	0.282	0.0135115	0.215267	15.9322
5	-3.82547	1.32	0.018	0.283	0.0136364	0.214394	15.7222
5	-3.81335	1.32	0.0179	0.283	0.0135606	0.214394	15.8101
5	-3.80127	1.34	0.0185	0.282	0.013806	0.210448	15.2432
5	-3.78914	1.37	0.0186	0.282	0.0135766	0.205839	15.1613
5	-3.77701	1.38	0.0189	0.283	0.0136957	0.205072	14.9735
5	-3.76493	1.39	0.019	0.284	0.0136691	0.204317	14.9474
5	-3.75285	1.41	0.0192	0.283	0.013617	0.200709	14.7396
5	-3.74072	1.44	0.0196	0.282	0.0136111	0.195833	14.3878
5	-3.72864	1.45	0.0196	0.283	0.0135172	0.195172	14.4388
5	-3.71656	1.45	0.0196	0.283	0.0135172	0.195172	14.4388
5	-3.70439	1.48	0.02	0.284	0.0135135	0.191892	14.2
5	-3.69231	1.5	0.0202	0.284	0.0134667	0.189333	14.0594
5	-3.68018	1.51	0.0204	0.284	0.0135099	0.188079	13.9216
5	-3.6681	1.52	0.0206	0.284	0.0135526	0.186842	13.7864
5	-3.65597	1.54	0.0208	0.284	0.0135065	0.184416	13.6538
5	-3.64389	1.57	0.0211	0.283	0.0134395	0.180255	13.4123
5	-3.63176	1.59	0.0216	0.284	0.0135849	0.178616	13.1481
5	-3.61968	1.61	0.0217	0.283	0.0134783	0.175776	13.0415
5	-3.60755	1.62	0.0219	0.284	0.0135185	0.175309	12.968
5	-3.59543	1.63	0.0221	0.283	0.0135583	0.17362	12.8054
5	-3.58335	1.64	0.0221	0.283	0.0134756	0.172561	12.8054
5	-3.57122	1.67	0.0226	0.284	0.0135329	0.17006	12.5664
5	-3.55914	1.68	0.0226	0.283	0.0134524	0.168452	12.5221
5	-3.54701	1.7	0.0229	0.284	0.0134706	0.167059	12.4017
5	-3.53493	1.69	0.0228	0.283	0.0134911	0.167456	12.4123
5	-3.5228	1.72	0.0232	0.283	0.0134884	0.164535	12.1983
5	-3.51072	1.75	0.0235	0.284	0.0134286	0.162286	12.0851
5	-3.4986	1.77	0.0239	0.281	0.0135028	0.158757	11.7573
5	-3.48651	1.8	0.0243	0.282	0.0135	0.156667	11.6049
5	-3.47439	1.82	0.0245	0.283	0.0134615	0.155495	11.551
5	-3.4623	1.83	0.0247	0.283	0.0134973	0.154645	11.4575
5	-3.45018	1.85	0.0249	0.282	0.0134595	0.152432	11.3253
5	-3.4381	1.87	0.0252	0.282	0.0134759	0.150802	11.1905
5	-3.42597	1.9	0.0255	0.282	0.0134211	0.148421	11.0588
5	-3.41389	1.9	0.0256	0.281	0.0134737	0.147895	10.9766
5	-3.40176	1.92	0.0257	0.283	0.0133854	0.147396	11.0117
5	-3.38968	1.94	0.0261	0.281	0.0134536	0.144845	10.7663
5	-3.37755	1.96	0.0264	0.283	0.0134694	0.144388	10.7197
5	-3.36543	1.96	0.0263	0.28	0.0134184	0.142857	10.6464
5	-3.35335	2	0.027	0.284	0.0135	0.142	10.5185
5	-3.34122	2.02	0.0273	0.283	0.0135149	0.140099	10.3663
5	-3.32914	2.02	0.0271	0.282	0.0134158	0.139604	10.4059
5	-3.31705	2.04	0.0273	0.283	0.0133824	0.138725	10.3663
5	-3.30493	2.06	0.0276	0.284	0.0133981	0.137864	10.2899
5	-3.2928	2.08	0.0279	0.282	0.0134135	0.135577	10.1075
5	-3.28072	2.09	0.028	0.282	0.0133971	0.134928	10.0714
5	-3.26859	2.09	0.028	0.28	0.0133971	0.133971	10
5	-3.25647	2.11	0.0284	0.282	0.0134597	0.133649	9.92958
5	-3.24439	2.13	0.0285	0.282	0.0133803	0.132394	9.89474
5	-3.2323	2.15	0.0287	0.283	0.0133488	0.131628	9.86063
5	-3.22018	2.16	0.0291	0.283	0.0134722	0.131019	9.72509
5	-3.2081	2.18	0.0292	0.281	0.0133945	0.128899	9.62329
5	-3.19597	2.2	0.0294	0.28	0.0133636	0.127273	9.52381
5	-3.18384	2.21	0.0295	0.281	0.0133484	0.127149	9.52542
5	-3.17176	2.21	0.0296	0.282	0.0133937	0.127602	9.52703
5	-3.15963	2.24	0.0299	0.282	0.0133482	0.125893	9.43144
5	-3.14755	2.24	0.03	0.281	0.0133929	0.125446	9.36667
5	-3.13543	2.25	0.0302	0.28	0.0134222	0.124444	9.27152
5	-3.12334	2.27	0.0304	0.281	0.0133921	0.123789	9.24342
5	-3.11122	2.28	0.0306	0.281	0.0134211	0.123246	9.18301
5	-3.09914	2.29	0.0305	0.282	0.0133188	0.123144	9.2459
5	-3.08701	2.31	0.0308	0.28	0.0133333	0.121212	9.09091
5	-3.07488	2.32	0.0309	0.28	0.013319	0.12069	9.06149
5	-3.0628	2.33	0.0311	0.28	0.0133476	0.120172	9.00322
5	-3.05072	2.33	0.0312	0.28	0.0133906	0.120172	8.97436
5	-3.03859	2.35	0.0314	0.281	0.0133617	0.119574	8.94904
5	-3.02647	2.36	0.0315	0.281	0.0133475	0.119068	8.92063
5	-3.01438	2.36	0.0315	0.282	0.0133475	0.119492	8.95238
5	-3.00226	2.37	0.0318	0.281	0.0134177	0.118565	8.83648
5	-2.99018	2.37	0.0316	0.279	0.0133333	0.117722	8.82911
5	-2.97805	2.38	0.0317	0.281	0.0133193	0.118067	8.86435
5	-2.96597	2.38	0.0319	0.281	0.0134034	0.118067	8.80878
5	-2.95384	2.38	0.0318	0.281	0.0133613	0.118067	8.83648
5	-2.94176	2.39	0.032	0.282	0.0133891	0.117992	8.8125
5	-2.92963	2.38	0.0318	0.281	0.0133613	0.118067	8.83648
5	-2.91755	2.39	0.0319	0.28	0.0133473	0.117155	8.77743
5	-2.90542	2.41	0.0322	0.281	0.013361	0.116598	8.72671
5	-2.8933	2.38	0.0319	0.281	0.0134034	0.118067	8.80878
5	-2.88122	2.39	0.0319	0.281	0.0133473	0.117573	8.80878
5	-2.86909	2.38	0.0319	0.28	0.0134034	0.117647	8.77743
5	-2.85701	2.38	0.0319	0.281	0.0134034	0.118067	8.80878
5	-2.84488	2.38	0.0318	0.28	0.0133613	0.117647	8.80503
5	-2.8328	2.38	0.032	0.281	0.0134454	0.118067	8.78125
5	-2.82067	2.37	0.0318	0.281	0.0134177	0.118565	8.83648
5	-2.80859	2.37	0.0317	0.281	0.0133755	0.118565	8.86435
5	-2.79647	2.36	0.0318	0.281	0.0134746	0.119068	8.83648
5	-2.78438	2.37	0.0318	0.28	0.0134177	0.118143	8.80503
5	-2.77226	2.38	0.0319	0.281	0.0134034	0.118067	8.80878
5	-2.76017	2.36	0.0315	0.281	0.0133475	0.119068	8.92063
5	-2.74805	2.36	0.0315	0.279	0.0133475	0.11822	8.85714
5	-2.73592	2.34	0.0313	0.28	0.0133761	0.119658	8.94569
5	-2.72384	2.32	0.031	0.28	0.0133621	0.12069	9.03226
5	-2.71176	2.31	0.031	0.281	0.0134199	0.121645	9.06452
5	-2.69963	2.31	0.0311	0.28	0.0134632	0.121212	9.00322
5	-2.68751	2.3	0.0308	0.281	0.0133913	0.122174	9.12338
5	-2.67542	2.3	0.0309	0.281	0.0134348	0.122174	9.09385
5	-2.6633	2.3	0.0312	0.281	0.0135652	0.122174	9.00641
5	-2.65122	2.28	0.0306	0.281	0.0134211	0.123246	9.18301
5	-2.63909	2.28	0.0305	0.282	0.0133772	0.123684	9.2459
5	-2.62701	2.26	0.0303	0.28	0.0134071	0.123894	9.24092
5	-2.61488	2.24	0.03	0.281	0.0133929	0.125446	9.36667
5	-2.6028	2.22	0.0299	0.281	0.0134685	0.126577	9.39799
5	-2.59067	2.2	0.0295	0.281	0.0134091	0.127727	9.52542
5	-2.57855	2.19	0.0293	0.282	0.013379	0.128767	9.62457
5	-2.56646	2.18	0.0293	0.282	0.0134404	0.129358	9.62457
5	-2.55438	2.16	0.0291	0.282	0.0134722	0.130556	9.69072
5	-2.54226	2.13	0.0288	0.282	0.0135211	0.132394	9.79167
5	-2.53017	2.13	0.0287	0.282	0.0134742	0.132394	9.82578
5	-2.51805	2.12	0.0285	0.282	0.0134434	0.133019	9.89474
5	-2.50592	2.08	0.028	0.282	0.0134615	0.135577	10.0714
5	-2.49384	2.08	0.028	0.281	0.0134615	0.135096	10.0357
5	-2.48171	2.08	0.028	0.283	0.0134615	0.136058	10.1071
5	-2.46963	2.04	0.0276	0.282	0.0135294	0.138235	10.2174
5	-2.4575	2.04	0.0276	0.284	0.0135294	0.139216	10.2899
5	-2.44542	2.03	0.0273	0.284	0.0134483	0.139901	10.4029
5	-2.4333	2.02	0.0272	0.284	0.0134653	0.140594	10.4412
5	-2.42121	2.01	0.0272	0.285	0.0135323	0.141791	10.4779
5	-2.40909	1.98	0.0268	0.285	0.0135354	0.143939	10.6343
5	-2.39701	1.95	0.0264	0.284	0.0135385	0.145641	10.7576
5	-2.38488	1.94	0.0262	0.284	0.0135052	0.146392	10.8397
5	-2.3728	1.92	0.0261	0.285	0.0135937	0.148438	10.9195
5	-2.36067	1.93	0.0261	0.287	0.0135233	0.148705	10.9962
5	-2.34859	1.89	0.0254	0.285	0.0134392	0.150794	11.2205
5	-2.33646	1.87	0.0252	0.286	0.0134759	0.152941	11.3492
5	-2.32438	1.85	0.0248	0.287	0.0134054	0.155135	11.5726
5	-2.31225	1.83	0.0248	0.287	0.0135519	0.156831	11.5726
5	-2.30013	1.82	0.0247	0.287	0.0135714	0.157692	11.6194
5	-2.28805	1.8	0.0243	0.286	0.0135	0.158889	11.7695
5	-2.27592	1.79	0.0242	0.287	0.0135196	0.160335	11.8595
5	-2.26379	1.79	0.0242	0.286	0.0135196	0.159777	11.8182
5	-2.25171	1.77	0.0241	0.288	0.0136158	0.162712	11.9502
5	-2.23963	1.77	0.0241	0.288	0.0136158	0.162712	11.9502
5	-2.2275	1.73	0.0234	0.288	0.013526	0.166474	12.3077
5	-2.21538	1.73	0.0233	0.287	0.0134682	0.165896	12.3176
5	-2.20329	1.7	0.0231	0.29	0.0135882	0.170588	12.5541
5	-2.19117	1.67	0.0225	0.29	0.0134731	0.173653	12.8889
5	-2.17909	1.65	0.0224	0.289	0.0135758	0.175152	12.9018
5	-2.16696	1.64	0.0224	0.289	0.0136585	0.17622	12.9018
5	-2.15488	1.61	0.0219	0.29	0.0136025	0.180124	13.242
5	-2.14275	1.59	0.0218	0.29	0.0137107	0.18239	13.3028
5	-2.13067	1.57	0.0215	0.291	0.0136943	0.18535	13.5349
5	-2.11854	1.56	0.0211	0.29	0.0135256	0.185897	13.7441
5	-2.10646	1.54	0.021	0.291	0.0136364	0.188961	13.8571
5	-2.09433	1.53	0.0207	0.291	0.0135294	0.190196	14.058
5	-2.08225	1.52	0.0206	0.291	0.0135526	0.191447	14.1262
5	-2.07013	1.5	0.0204	0.292	0.0136	0.194667	14.3137
5	-2.05804	1.5	0.0204	0.292	0.0136	0.194667	14.3137
5	-2.04592	1.49	0.0204	0.292	0.0136913	0.195973	14.3137
5	-2.03384	1.47	0.0201	0.292	0.0136735	0.198639	14.5274
5	-2.02171	1.44	0.0196	0.291	0.0136111	0.202083	14.8469
5	-2.00958	1.43	0.0196	0.293	0.0137063	0.204895	14.949
5	-1.9975	1.42	0.0194	0.293	0.013662	0.206338	15.1031
5	-1.98538	1.38	0.019	0.292	0.0137681	0.211594	15.3684
5	-1.97329	1.38	0.0187	0.292	0.0135507	0.211594	15.615
5	-1.96117	1.39	0.019	0.293	0.0136691	0.210791	15.4211
5	-1.94908	1.37	0.0187	0.293	0.0136496	0.213869	15.6684
5	-1.93696	1.35	0.0185	0.293	0.0137037	0.217037	15.8378
5	-1.92488	1.33	0.0182	0.293	0.0136842	0.220301	16.0989
5	-1.91275	1.33	0.0183	0.294	0.0137594	0.221053	16.0656
5	-1.90062	1.31	0.018	0.293	0.0137405	0.223664	16.2778
5	-1.88854	1.29	0.0177	0.294	0.0137209	0.227907	16.6102
5	-1.87642	1.28	0.0175	0.294	0.0136719	0.229687	16.8
5	-1.86433	1.26	0.0174	0.293	0.0138095	0.23254	16.8391
5	-1.85221	1.25	0.0171	0.294	0.01368	0.2352	17.193
5	-1.84013	1.24	0.0171	0.295	0.0137903	0.237903	17.2515
5	-1.828	1.23	0.0169	0.295	0.0137398	0.239837	17.4556
5	-1.81592	1.21	0.0168	0.294	0.0138843	0.242975	17.5
5	-1.80379	1.19	0.0163	0.294	0.0136975	0.247059	18.0368
5	-1.79166	1.19	0.0165	0.295	0.0138655	0.247899	17.8788
5	-1.77958	1.19	0.0163	0.294	0.0136975	0.247059	18.0368
5	-1.76746	1.18	0.0161	0.294	0.0136441	0.249153	18.2609
5	-1.75537	1.16	0.0158	0.294	0.0136207	0.253448	18.6076
5	-1.74325	1.16	0.0159	0.295	0.0137069	0.25431	18.5535
5	-1.73117	1.15	0.0158	0.295	0.0137391	0.256522	18.6709
5	-1.71904	1.13	0.0155	0.294	0.0137168	0.260177	18.9677
5	-1.70696	1.13	0.0155	0.295	0.0137168	0.261062	19.0323
5	-1.69483	1.12	0.0155	0.295	0.0138393	0.263393	19.0323
5	-1.6827	1.1	0.0151	0.294	0.0137273	0.267273	19.4702
5	-1.67062	1.09	0.015	0.295	0.0137615	0.270642	19.6667
5	-1.6585	1.07	0.0148	0.295	0.0138318	0.275701	19.9324
5	-1.64641	1.07	0.0149	0.295	0.0139252	0.275701	19.7987
5	-1.63429	1.07	0.0146	0.294	0.0136449	0.274766	20.137
5	-1.62221	1.05	0.0145	0.295	0.0138095	0.280952	20.3448
5	-1.61012	1.04	0.0142	0.295	0.0136538	0.283654	20.7746
5	-1.598	1.03	0.0143	0.295	0.0138835	0.286408	20.6294
5	-1.58587	1.02	0.0141	0.294	0.0138235	0.288235	20.8511
5	-1.57379	1	0.0139	0.294	0.0139	0.294	21.1511
5	-1.56171	0.988	0.0137	0.294	0.0138664	0.297571	21.4599
5	-1.54958	0.98	0.0136	0.295	0.0138776	0.30102	21.6912
5	-1.5375	0.972	0.0135	0.294	0.0138889	0.302469	21.7778
5	-1.52537	0.96	0.0133	0.294	0.0138542	0.30625	22.1053
5	-1.51325	0.953	0.0133	0.294	0.0139559	0.308499	22.1053
5	-1.50116	0.945	0.0132	0.294	0.0139683	0.311111	22.2727
5	-1.48904	0.942	0.013	0.294	0.0138004	0.312102	22.6154
5	-1.47696	0.933	0.0129	0.294	0.0138264	0.315113	22.7907
5	-1.46483	0.924	0.0128	0.294	0.0138528	0.318182	22.9688
5	-1.45275	0.906	0.0125	0.293	0.0137969	0.3234	23.44
5	-1.44062	0.892	0.0124	0.293	0.0139013	0.328475	23.629
5	-1.42854	0.897	0.0125	0.294	0.0139353	0.327759	23.52
5	-1.41641	0.895	0.0126	0.293	0.0140782	0.327374	23.254
5	-1.40429	0.885	0.0122	0.293	0.0137853	0.331073	24.0164
5	-1.3922	0.866	0.012	0.293	0.0138568	0.338337	24.4167
5	-1.38012	0.858	0.012	0.293	0.013986	0.341492	24.4167
5	-1.368	0.852	0.0118	0.293	0.0138498	0.343897	24.8305
5	-1.35591	0.839	0.0117	0.293	0.0139452	0.349225	25.0427
5	-1.34374	0.837	0.0115	0.293	0.0137395	0.35006	25.4783
5	-1.33171	0.827	0.0117	0.292	0.0141475	0.353083	24.9573
5	-1.31958	0.818	0.0115	0.292	0.0140587	0.356968	25.3913
5	-1.30745	0.813	0.0114	0.292	0.0140221	0.359164	25.614
5	-1.29537	0.815	0.0114	0.292	0.0139877	0.358282	25.614
5	-1.28325	0.813	0.0113	0.292	0.0138991	0.359164	25.8407
5	-1.27116	0.802	0.0111	0.292	0.0138404	0.36409	26.3063
5	-1.25904	0.791	0.011	0.291	0.0139064	0.367889	26.4545
5	-1.24691	0.778	0.0109	0.291	0.0140103	0.374036	26.6972
5	-1.23483	0.768	0.0107	0.291	0.0139323	0.378906	27.1963
5	-1.22275	0.758	0.0106	0.291	0.0139842	0.383905	27.4528
5	-1.21062	0.753	0.0106	0.291	0.014077	0.386454	27.4528
5	-1.19849	0.75	0.0103	0.291	0.0137333	0.388	28.2524
5	-1.18641	0.741	0.0105	0.291	0.01417	0.392713	27.7143
5	-1.17429	0.738	0.0103	0.291	0.0139566	0.394309	28.2524
5	-1.1622	0.735	0.0104	0.291	0.0141497	0.395918	27.9808
5	-1.15008	0.727	0.0101	0.29	0.0138927	0.3989	28.7129
5	-1.13799	0.72	0.0101	0.29	0.0140278	0.402778	28.7129
5	-1.12587	0.715	0.00988	0.29	0.0138182	0.405594	29.3522
5	-1.11379	0.711	0.00998	0.29	0.0140366	0.407876	29.0581
5	-1.10166	0.702	0.00986	0.29	0.0140456	0.413105	29.4118
5	-1.08953	0.7	0.00987	0.289	0.0141	0.412857	29.2806
5	-1.0775	0.698	0.00979	0.289	0.0140258	0.41404	29.5199
5	-1.06537	0.698	0.0097	0.29	0.0138968	0.415473	29.8969
5	-1.05324	0.689	0.0098	0.289	0.0142235	0.419448	29.4898
5	-1.04112	0.682	0.00969	0.289	0.0142082	0.423754	29.8246
5	-1.02904	0.681	0.00961	0.289	0.0141116	0.424376	30.0728
5	-1.01695	0.675	0.00951	0.289	0.0140889	0.428148	30.3891
5	-1.00483	0.668	0.00948	0.289	0.0141916	0.432635	30.4852
5	-0.992701	0.665	0.00936	0.289	0.0140752	0.434586	30.8761
5	-0.980619	0.659	0.00915	0.288	0.0138847	0.437026	31.4754
5	-0.968536	0.649	0.00904	0.288	0.0139291	0.44376	31.8584
5	-0.95641	0.645	0.00894	0.289	0.0138605	0.448062	32.3266
5	-0.944284	0.645	0.00894	0.288	0.0138605	0.446512	32.2148
5	-0.932158	0.644	0.0091	0.288	0.0141304	0.447205	31.6484
5	-0.920076	0.637	0.00897	0.288	0.0140816	0.452119	32.107
5	-0.907949	0.63	0.00893	0.288	0.0141746	0.457143	32.2508
5	-0.895867	0.624	0.00874	0.288	0.0140064	0.461538	32.9519
5	-0.883785	0.62	0.00861	0.288	0.0138871	0.464516	33.4495
5	-0.871659	0.618	0.00871	0.287	0.0140939	0.464401	32.9506
5	-0.859533	0.617	0.00872	0.288	0.0141329	0.466775	33.0275
5	-0.847407	0.611	0.00868	0.287	0.0142062	0.469722	33.0645
5	-0.835324	0.606	0.00847	0.287	0.0139769	0.473597	33.8843
5	-0.823242	0.6	0.00843	0.287	0.01405	0.478333	34.0451
5	-0.81116	0.6	0.00848	0.287	0.0141333	0.478333	33.8443
5	-0.799034	0.596	0.00838	0.287	0.0140604	0.481544	34.2482
5	-0.786908	0.591	0.00825	0.287	0.0139594	0.485618	34.7879
5	-0.774826	0.592	0.00837	0.287	0.0141385	0.484797	34.2891
5	-0.762699	0.591	0.0084	0.287	0.0142132	0.485618	34.1667
5	-0.750573	0.584	0.00826	0.287	0.0141438	0.491438	34.7458
5	-0.738491	0.578	0.00828	0.287	0.0143253	0.49654	34.6618
5	-0.726365	0.577	0.00816	0.286	0.0141421	0.495667	35.049
5	-0.714283	0.574	0.00806	0.286	0.0140418	0.498258	35.4839
5	-0.702156	0.57	0.00794	0.287	0.0139298	0.503509	36.1461
5	-0.690074	0.564	0.00789	0.287	0.0139894	0.508865	36.3752
5	-0.677992	0.565	0.00815	0.287	0.0144248	0.507965	35.2147
5	-0.665866	0.563	0.008	0.286	0.0142096	0.507993	35.75
5	-0.65374	0.558	0.00791	0.286	0.0141756	0.512545	36.1568
5	-0.641658	0.555	0.0079	0.286	0.0142342	0.515315	36.2025
5	-0.629531	0.55	0.00772	0.286	0.0140364	0.52	37.0466
5	-0.617449	0.546	0.00771	0.286	0.0141209	0.52381	37.0947
5	-0.605323	0.543	0.00763	0.286	0.0140516	0.526703	37.4836
5	-0.593241	0.541	0.00776	0.286	0.0143438	0.528651	36.8557
5	-0.581115	0.536	0.00762	0.286	0.0142164	0.533582	37.5328
5	-0.568989	0.53	0.00751	0.286	0.0141698	0.539623	38.0826
5	-0.556906	0.527	0.00739	0.285	0.0140228	0.540797	38.5656
5	-0.54478	0.527	0.00747	0.286	0.0141746	0.542694	38.2865
5	-0.532698	0.524	0.0074	0.286	0.0141221	0.545802	38.6486
5	-0.520616	0.519	0.00728	0.286	0.014027	0.55106	39.2857
5	-0.50849	0.516	0.00759	0.286	0.0147093	0.554264	37.6812
5	-0.496363	0.512	0.00717	0.286	0.0140039	0.558594	39.8884
5	-0.484237	0.507	0.00709	0.286	0.0139842	0.564103	40.3385
5	-0.472155	0.507	0.0072	0.286	0.0142012	0.564103	39.7222
5	-0.460029	0.505	0.0073	0.285	0.0144554	0.564356	39.0411
5	-0.447947	0.504	0.00721	0.286	0.0143056	0.56746	39.6671
5	-0.435821	0.502	0.00707	0.287	0.0140837	0.571713	40.5941
5	-0.423738	0.498	0.00691	0.287	0.0138755	0.576305	41.534
5	-0.411612	0.496	0.00688	0.287	0.013871	0.578629	41.7151
5	-0.39953	0.494	0.0071	0.286	0.0143725	0.578947	40.2817
5	-0.387404	0.494	0.00697	0.286	0.0141093	0.578947	41.033
5	-0.375322	0.495	0.00713	0.286	0.014404	0.577778	40.1122
5	-0.36324	0.495	0.00704	0.286	0.0142222	0.577778	40.625
5	-0.351113	0.496	0.007	0.286	0.0141129	0.576613	40.8571
5	-0.338987	0.496	0.00712	0.287	0.0143548	0.578629	40.309
5	-0.326861	0.495	0.00699	0.287	0.0141212	0.579798	41.0587
5	-0.314779	0.495	0.00704	0.286	0.0142222	0.577778	40.625
5	-0.302653	0.495	0.00696	0.286	0.0140606	0.577778	41.092
5	-0.29057	0.495	0.00705	0.286	0.0142424	0.577778	40.5674
5	-0.278444	0.496	0.00702	0.286	0.0141532	0.576613	40.7407
5	-0.266362	0.497	0.00698	0.286	0.0140443	0.575453	40.9742
5	-0.25428	0.497	0.00713	0.287	0.0143461	0.577465	40.2525
5	-0.242154	0.495	0.00707	0.286	0.0142828	0.577778	40.4526
5	-0.230072	0.496	0.00706	0.286	0.0142339	0.576613	40.5099
5	-0.217945	0.496	0.00705	0.286	0.0142137	0.576613	40.5674
5	-0.205863	0.495	0.00706	0.286	0.0142626	0.577778	40.5099
5	-0.193693	0.496	0.00716	0.286	0.0144355	0.576613	39.9441
5	-0.181611	0.495	0.00723	0.286	0.0146061	0.577778	39.5574
5	-0.169485	0.495	0.00711	0.287	0.0143636	0.579798	40.3657
5	-0.157403	0.494	0.00687	0.286	0.0139069	0.578947	41.6303
5	-0.145276	0.494	0.00702	0.286	0.0142105	0.578947	40.7407
5	-0.133194	0.495	0.00713	0.287	0.014404	0.579798	40.2525
5	-0.121112	0.495	0.00711	0.287	0.0143636	0.579798	40.3657
5	-0.108986	0.493	0.00703	0.287	0.0142596	0.58215	40.825
5	-0.0969037	0.494	0.007	0.287	0.01417	0.580972	41
5	-0.0847775	0.493	0.00693	0.287	0.0140568	0.58215	41.4141
5	-0.0726513	0.494	0.00724	0.287	0.0146559	0.580972	39.6409
5	-0.0605691	0.495	0.00722	0.287	0.0145859	0.579798	39.7507
5	-0.0484429	0.494	0.00693	0.287	0.0140283	0.580972	41.4141
5	-0.0363608	0.495	0.00686	0.286	0.0138586	0.577778	41.691
5	-0.0242346	0.494	0.00692	0.286	0.0140081	0.578947	41.3295
5	-0.0121524	0.495	0.00693	0.287	0.014	0.579798	41.4141
5	-2.62213e-05	0.494	0.00704	0.286	0.014251	0.578947	40.625
5	0.0121	0.495	0.00703	0.287	0.014202	0.579798	40.825
4.8	-4.9362	0.631	0.00886	0.285	0.0140412	0.451664	32.167
4.8	-4.92413	0.631	0.00875	0.284	0.0138669	0.450079	32.4571
4.8	-4.91201	0.635	0.00893	0.285	0.014063	0.448819	31.9149
4.8	-4.89993	0.633	0.00899	0.285	0.0142022	0.450237	31.7019
4.8	-4.88781	0.632	0.00894	0.285	0.0141456	0.450949	31.8792
4.8	-4.8757	0.635	0.00883	0.285	0.0139055	0.448819	32.2763
4.8	-4.86362	0.634	0.00886	0.284	0.0139748	0.44795	32.0542
4.8	-4.8515	0.632	0.00886	0.286	0.014019	0.452532	32.2799
4.8	-4.83943	0.633	0.00893	0.285	0.0141074	0.450237	31.9149
4.8	-4.82735	0.634	0.00895	0.285	0.0141167	0.449527	31.8436
4.8	-4.81524	0.633	0.00881	0.285	0.0139179	0.450237	32.3496
4.8	-4.80312	0.631	0.0088	0.286	0.0139461	0.453249	32.5
4.8	-4.791	0.635	0.00901	0.285	0.014189	0.448819	31.6315
4.8	-4.77892	0.63	0.0088	0.286	0.0139683	0.453968	32.5
4.8	-4.76685	0.631	0.00887	0.285	0.0140571	0.451664	32.1308
4.8	-4.75473	0.631	0.00891	0.285	0.0141204	0.451664	31.9865
4.8	-4.74266	0.631	0.00877	0.285	0.0138986	0.451664	32.4971
4.8	-4.73054	0.632	0.00891	0.286	0.0140981	0.452532	32.0988
4.8	-4.71846	0.641	0.00888	0.285	0.0138534	0.444618	32.0946
4.8	-4.70635	0.645	0.0091	0.286	0.0141085	0.443411	31.4286
4.8	-4.69423	0.654	0.00914	0.285	0.0139755	0.43578	31.1816
4.8	-4.68215	0.664	0.00932	0.285	0.0140361	0.429217	30.5794
4.8	-4.67003	0.671	0.0094	0.285	0.0140089	0.424739	30.3191
4.8	-4.65796	0.68	0.00959	0.284	0.0141029	0.417647	29.6142
4.8	-4.64589	0.689	0.00953	0.285	0.0138316	0.413643	29.9056
4.8	-4.63377	0.701	0.00973	0.285	0.0138802	0.406562	29.2909
4.8	-4.62165	0.71	0.0099	0.284	0.0139437	0.4	28.6869
4.8	-4.60957	0.711	0.00995	0.284	0.0139944	0.399437	28.5427
4.8	-4.59746	0.723	0.01	0.285	0.0138313	0.394191	28.5
4.8	-4.58538	0.737	0.0102	0.284	0.0138399	0.385346	27.8431
4.8	-4.57326	0.745	0.0103	0.284	0.0138255	0.381208	27.5728
4.8	-4.56119	0.756	0.0105	0.285	0.0138889	0.376984	27.1429
4.8	-4.54911	0.772	0.0108	0.285	0.0139896	0.369171	26.3889
4.8	-4.53695	0.777	0.0109	0.285	0.0140283	0.366795	26.1468
4.8	-4.52488	0.774	0.0108	0.285	0.0139535	0.368217	26.3889
4.8	-4.51276	0.784	0.0109	0.284	0.0139031	0.362245	26.055
4.8	-4.50068	0.795	0.0112	0.285	0.0140881	0.358491	25.4464
4.8	-4.48861	0.8	0.011	0.285	0.01375	0.35625	25.9091
4.8	-4.47649	0.808	0.0111	0.284	0.0137376	0.351485	25.5856
4.8	-4.46442	0.818	0.0115	0.285	0.0140587	0.348411	24.7826
4.8	-4.45225	0.82	0.0115	0.285	0.0140244	0.347561	24.7826
4.8	-4.44018	0.825	0.0113	0.285	0.013697	0.345455	25.2212
4.8	-4.42811	0.837	0.0117	0.284	0.0139785	0.339307	24.2735
4.8	-4.41599	0.84	0.0116	0.284	0.0138095	0.338095	24.4828
4.8	-4.40391	0.845	0.0118	0.285	0.0139645	0.337278	24.1525
4.8	-4.39179	0.84	0.0117	0.284	0.0139286	0.338095	24.2735
4.8	-4.37968	0.849	0.0117	0.284	0.0137809	0.334511	24.2735
4.8	-4.3676	0.862	0.0122	0.284	0.0141531	0.329466	23.2787
4.8	-4.35548	0.871	0.0121	0.285	0.0138921	0.32721	23.5537
4.8	-4.34341	0.881	0.0123	0.284	0.0139614	0.322361	23.0894
4.8	-4.33133	0.893	0.0122	0.285	0.0136618	0.319149	23.3607
4.8	-4.31922	0.903	0.0126	0.285	0.0139535	0.315615	22.619
4.8	-4.30714	0.913	0.0127	0.285	0.0139102	0.312158	22.4409
4.8	-4.29502	0.924	0.0127	0.284	0.0137446	0.307359	22.3622
4.8	-4.28295	0.93	0.0129	0.285	0.013871	0.306452	22.093
4.8	-4.27079	0.932	0.0129	0.285	0.0138412	0.305794	22.093
4.8	-4.25871	0.937	0.013	0.284	0.0138741	0.303095	21.8462
4.8	-4.24664	0.94	0.013	0.284	0.0138298	0.302128	21.8462
4.8	-4.23452	0.949	0.0131	0.284	0.013804	0.299262	21.6794
4.8	-4.22244	0.958	0.0132	0.284	0.0137787	0.296451	21.5152
4.8	-4.21033	0.97	0.0134	0.284	0.0138144	0.292784	21.194
4.8	-4.19825	0.981	0.0135	0.284	0.0137615	0.289501	21.037
4.8	-4.18613	0.992	0.0139	0.283	0.0140121	0.285282	20.3597
4.8	-4.17401	0.997	0.0137	0.284	0.0137412	0.284855	20.7299
4.8	-4.16194	1.01	0.0139	0.282	0.0137624	0.279208	20.2878
4.8	-4.14987	1.03	0.0141	0.283	0.0136893	0.274757	20.0709
4.8	-4.13775	1.03	0.0141	0.283	0.0136893	0.274757	20.0709
4.8	-4.12567	1.04	0.0145	0.283	0.0139423	0.272115	19.5172
4.8	-4.11351	1.06	0.0146	0.283	0.0137736	0.266981	19.3836
4.8	-4.10144	1.07	0.0146	0.283	0.0136449	0.264486	19.3836
4.8	-4.08932	1.07	0.0148	0.282	0.0138318	0.263551	19.0541
4.8	-4.07724	1.09	0.0151	0.283	0.0138532	0.259633	18.7417
4.8	-4.06512	1.1	0.015	0.284	0.0136364	0.258182	18.9333
4.8	-4.05305	1.1	0.0151	0.284	0.0137273	0.258182	18.8079
4.8	-4.04093	1.11	0.0151	0.283	0.0136036	0.254955	18.7417
4.8	-4.02886	1.12	0.0153	0.282	0.0136607	0.251786	18.4314
4.8	-4.01674	1.14	0.0156	0.283	0.0136842	0.248246	18.141
4.8	-4.00466	1.16	0.0159	0.283	0.0137069	0.243966	17.7987
4.8	-3.99259	1.18	0.0162	0.284	0.0137288	0.240678	17.5309
4.8	-3.98047	1.19	0.0162	0.283	0.0136134	0.237815	17.4691
4.8	-3.96835	1.2	0.0164	0.282	0.0136667	0.235	17.1951
4.8	-3.95628	1.2	0.0163	0.284	0.0135833	0.236667	17.4233
4.8	-3.94416	1.22	0.0167	0.283	0.0136885	0.231967	16.9461
4.8	-3.93209	1.25	0.017	0.283	0.0136	0.2264	16.6471
4.8	-3.91997	1.25	0.0171	0.282	0.01368	0.2256	16.4912
4.8	-3.90789	1.27	0.0173	0.283	0.013622	0.222835	16.3584
4.8	-3.89577	1.3	0.0179	0.283	0.0137692	0.217692	15.8101
4.8	-3.8837	1.31	0.0179	0.282	0.0136641	0.215267	15.7542
4.8	-3.87158	1.31	0.0179	0.284	0.0136641	0.216794	15.8659
4.8	-3.85946	1.32	0.0179	0.283	0.0135606	0.214394	15.8101
4.8	-3.84739	1.35	0.0185	0.283	0.0137037	0.20963	15.2973
4.8	-3.83527	1.36	0.0185	0.282	0.0136029	0.207353	15.2432
4.8	-3.8232	1.38	0.0186	0.283	0.0134783	0.205072	15.2151
4.8	-3.81112	1.41	0.019	0.282	0.0134752	0.2	14.8421
4.8	-3.799	1.43	0.0195	0.281	0.0136364	0.196503	14.4103
4.8	-3.78693	1.45	0.0197	0.282	0.0135862	0.194483	14.3147
4.8	-3.77481	1.46	0.0198	0.282	0.0135616	0.193151	14.2424
4.8	-3.76269	1.49	0.0203	0.283	0.0136242	0.189933	13.9409
4.8	-3.75062	1.5	0.0205	0.282	0.0136667	0.188	13.7561
4.8	-3.7385	1.51	0.0204	0.284	0.0135099	0.188079	13.9216
4.8	-3.72642	1.52	0.0207	0.283	0.0136184	0.186184	13.6715
4.8	-3.71431	1.55	0.0209	0.282	0.0134839	0.181935	13.4928
4.8	-3.70223	1.57	0.0214	0.282	0.0136306	0.179618	13.1776
4.8	-3.69011	1.58	0.0215	0.283	0.0136076	0.179114	13.1628
4.8	-3.678	1.62	0.0219	0.283	0.0135185	0.174691	12.9224
4.8	-3.66592	1.64	0.0222	0.283	0.0135366	0.172561	12.7477
4.8	-3.6538	1.65	0.0224	0.283	0.0135758	0.171515	12.6339
4.8	-3.64173	1.68	0.0228	0.281	0.0135714	0.167262	12.3246
4.8	-3.62961	1.7	0.0229	0.283	0.0134706	0.166471	12.3581
4.8	-3.61753	1.7	0.0228	0.283	0.0134118	0.166471	12.4123
4.8	-3.60542	1.7	0.0231	0.282	0.0135882	0.165882	12.2078
4.8	-3.59334	1.72	0.0232	0.282	0.0134884	0.163953	12.1552
4.8	-3.58122	1.75	0.0237	0.283	0.0135429	0.161714	11.9409
4.8	-3.56911	1.76	0.0237	0.283	0.0134659	0.160795	11.9409
4.8	-3.55703	1.77	0.0238	0.283	0.0134463	0.159887	11.8908
4.8	-3.54496	1.8	0.0243	0.283	0.0135	0.157222	11.6461
4.8	-3.53284	1.82	0.0244	0.283	0.0134066	0.155495	11.5984
4.8	-3.52072	1.85	0.0249	0.283	0.0134595	0.152973	11.3655
4.8	-3.50865	1.87	0.0252	0.284	0.0134759	0.151872	11.2698
4.8	-3.49657	1.9	0.0255	0.282	0.0134211	0.148421	11.0588
4.8	-3.48445	1.91	0.0256	0.282	0.0134031	0.147644	11.0156
4.8	-3.47233	1.91	0.0257	0.283	0.0134555	0.148168	11.0117
4.8	-3.46026	1.92	0.026	0.282	0.0135417	0.146875	10.8462
4.8	-3.44818	1.95	0.0261	0.284	0.0133846	0.145641	10.8812
4.8	-3.43602	1.98	0.0265	0.284	0.0133838	0.143434	10.717
4.8	-3.42395	1.99	0.0267	0.284	0.0134171	0.142714	10.6367
4.8	-3.41187	2.01	0.0269	0.28	0.0133831	0.139303	10.4089
4.8	-3.39976	2.03	0.0273	0.282	0.0134483	0.138916	10.3297
4.8	-3.38768	2.04	0.0275	0.282	0.0134804	0.138235	10.2545
4.8	-3.37556	2.06	0.0277	0.282	0.0134466	0.136893	10.1805
4.8	-3.36349	2.08	0.0279	0.28	0.0134135	0.134615	10.0358
4.8	-3.35137	2.09	0.0281	0.282	0.013445	0.134928	10.0356
4.8	-3.3393	2.1	0.0283	0.28	0.0134762	0.133333	9.89399
4.8	-3.32718	2.12	0.0285	0.281	0.0134434	0.132547	9.85965
4.8	-3.31506	2.13	0.0286	0.282	0.0134272	0.132394	9.86014
4.8	-3.30298	2.16	0.029	0.283	0.0134259	0.131019	9.75862
4.8	-3.29091	2.18	0.0293	0.282	0.0134404	0.129358	9.62457
4.8	-3.27879	2.2	0.0295	0.281	0.0134091	0.127727	9.52542
4.8	-3.26667	2.22	0.0298	0.282	0.0134234	0.127027	9.46309
4.8	-3.2546	2.23	0.0298	0.282	0.0133632	0.126457	9.46309
4.8	-3.24248	2.25	0.0302	0.282	0.0134222	0.125333	9.33775
4.8	-3.23036	2.27	0.0302	0.282	0.013304	0.124229	9.33775
4.8	-3.21829	2.29	0.0308	0.282	0.0134498	0.123144	9.15584
4.8	-3.20617	2.31	0.0309	0.283	0.0133766	0.122511	9.15858
4.8	-3.19409	2.31	0.0311	0.28	0.0134632	0.121212	9.00322
4.8	-3.18202	2.33	0.0313	0.279	0.0134335	0.119742	8.91374
4.8	-3.1699	2.35	0.0316	0.281	0.0134468	0.119574	8.89241
4.8	-3.15778	2.37	0.0316	0.281	0.0133333	0.118565	8.89241
4.8	-3.14571	2.41	0.0323	0.282	0.0134025	0.117012	8.73065
4.8	-3.13359	2.41	0.0322	0.281	0.013361	0.116598	8.72671
4.8	-3.12152	2.41	0.0323	0.281	0.0134025	0.116598	8.69969
4.8	-3.1094	2.43	0.0324	0.279	0.0133333	0.114815	8.61111
4.8	-3.09728	2.44	0.0326	0.28	0.0133607	0.114754	8.58896
4.8	-3.0852	2.46	0.0328	0.281	0.0133333	0.114228	8.56707
4.8	-3.07313	2.47	0.0329	0.281	0.0133198	0.113765	8.54103
4.8	-3.06101	2.47	0.0329	0.28	0.0133198	0.11336	8.51064
4.8	-3.04894	2.48	0.0332	0.28	0.0133871	0.112903	8.43373
4.8	-3.03677	2.49	0.0332	0.282	0.0133333	0.113253	8.49398
4.8	-3.02474	2.5	0.0335	0.28	0.0134	0.112	8.35821
4.8	-3.01263	2.5	0.0334	0.28	0.01336	0.112	8.38323
4.8	-3.00051	2.5	0.0334	0.281	0.01336	0.1124	8.41317
4.8	-2.98843	2.5	0.0334	0.28	0.01336	0.112	8.38323
4.8	-2.97631	2.51	0.0336	0.28	0.0133865	0.111554	8.33333
4.8	-2.96424	2.5	0.0333	0.279	0.01332	0.1116	8.37838
4.8	-2.95212	2.51	0.0334	0.28	0.0133068	0.111554	8.38323
4.8	-2.94	2.51	0.0335	0.28	0.0133466	0.111554	8.35821
4.8	-2.92793	2.51	0.0336	0.279	0.0133865	0.111155	8.30357
4.8	-2.91585	2.51	0.0337	0.28	0.0134263	0.111554	8.30861
4.8	-2.90374	2.51	0.0335	0.281	0.0133466	0.111952	8.38806
4.8	-2.89166	2.51	0.0336	0.28	0.0133865	0.111554	8.33333
4.8	-2.87954	2.5	0.0335	0.279	0.0134	0.1116	8.32836
4.8	-2.86742	2.5	0.0336	0.279	0.01344	0.1116	8.30357
4.8	-2.85535	2.52	0.0335	0.279	0.0132937	0.110714	8.32836
4.8	-2.84323	2.51	0.0335	0.28	0.0133466	0.111554	8.35821
4.8	-2.83116	2.49	0.0332	0.278	0.0133333	0.111647	8.37349
4.8	-2.81904	2.48	0.0332	0.278	0.0133871	0.112097	8.37349
4.8	-2.80696	2.47	0.033	0.279	0.0133603	0.112955	8.45455
4.8	-2.79485	2.46	0.0329	0.28	0.013374	0.113821	8.51064
4.8	-2.78277	2.46	0.0328	0.278	0.0133333	0.113008	8.47561
4.8	-2.77065	2.46	0.0329	0.28	0.013374	0.113821	8.51064
4.8	-2.75858	2.45	0.0327	0.279	0.0133469	0.113878	8.53211
4.8	-2.74646	2.43	0.0325	0.281	0.0133745	0.115638	8.64615
4.8	-2.73439	2.43	0.0328	0.28	0.0134979	0.115226	8.53659
4.8	-2.72227	2.43	0.0326	0.28	0.0134156	0.115226	8.58896
4.8	-2.71019	2.42	0.0323	0.281	0.0133471	0.116116	8.69969
4.8	-2.69807	2.41	0.0323	0.28	0.0134025	0.116183	8.66873
4.8	-2.68596	2.39	0.0321	0.28	0.013431	0.117155	8.72274
4.8	-2.67388	2.4	0.0321	0.28	0.013375	0.116667	8.72274
4.8	-2.66176	2.39	0.032	0.28	0.0133891	0.117155	8.75
4.8	-2.64969	2.36	0.0316	0.28	0.0133898	0.118644	8.86076
4.8	-2.63757	2.34	0.0312	0.281	0.0133333	0.120085	9.00641
4.8	-2.6255	2.33	0.0313	0.28	0.0134335	0.120172	8.94569
4.8	-2.61338	2.31	0.0309	0.28	0.0133766	0.121212	9.06149
4.8	-2.6013	2.3	0.0308	0.28	0.0133913	0.121739	9.09091
4.8	-2.58918	2.29	0.0308	0.28	0.0134498	0.122271	9.09091
4.8	-2.57707	2.26	0.0304	0.281	0.0134513	0.124336	9.24342
4.8	-2.56499	2.25	0.0302	0.281	0.0134222	0.124889	9.30464
4.8	-2.55287	2.24	0.0302	0.282	0.0134821	0.125893	9.33775
4.8	-2.5408	2.25	0.0301	0.283	0.0133778	0.125778	9.40199
4.8	-2.52872	2.23	0.0298	0.282	0.0133632	0.126457	9.46309
4.8	-2.51661	2.2	0.0296	0.282	0.0134545	0.128182	9.52703
4.8	-2.50449	2.18	0.0294	0.283	0.0134862	0.129817	9.62585
4.8	-2.49241	2.16	0.0291	0.282	0.0134722	0.130556	9.69072
4.8	-2.48029	2.16	0.0291	0.282	0.0134722	0.130556	9.69072
4.8	-2.46822	2.13	0.0286	0.282	0.0134272	0.132394	9.86014
4.8	-2.45615	2.11	0.0286	0.282	0.0135545	0.133649	9.86014
4.8	-2.44403	2.1	0.0283	0.282	0.0134762	0.134286	9.96466
4.8	-2.43191	2.07	0.0281	0.283	0.0135749	0.136715	10.0712
4.8	-2.41979	2.06	0.0277	0.283	0.0134466	0.137379	10.2166
4.8	-2.40772	2.03	0.0274	0.283	0.0134975	0.139409	10.3285
4.8	-2.39564	2.02	0.0272	0.284	0.0134653	0.140594	10.4412
4.8	-2.38352	1.99	0.0269	0.283	0.0135176	0.142211	10.5204
4.8	-2.37145	1.98	0.0267	0.284	0.0134848	0.143434	10.6367
4.8	-2.35933	1.95	0.0264	0.284	0.0135385	0.145641	10.7576
4.8	-2.34721	1.93	0.0262	0.285	0.0135751	0.147668	10.8779
4.8	-2.33514	1.93	0.026	0.286	0.0134715	0.148187	11
4.8	-2.32306	1.91	0.0258	0.285	0.0135079	0.149215	11.0465
4.8	-2.31094	1.89	0.0255	0.285	0.0134921	0.150794	11.1765
4.8	-2.29883	1.87	0.0252	0.286	0.0134759	0.152941	11.3492
4.8	-2.28675	1.86	0.0251	0.285	0.0134946	0.153226	11.3546
4.8	-2.27468	1.84	0.0249	0.287	0.0135326	0.155978	11.5261
4.8	-2.26251	1.81	0.0245	0.287	0.0135359	0.158564	11.7143
4.8	-2.25044	1.8	0.0243	0.287	0.0135	0.159444	11.8107
4.8	-2.23837	1.78	0.0242	0.288	0.0135955	0.161798	11.9008
4.8	-2.22625	1.76	0.0239	0.288	0.0135795	0.163636	12.0502
4.8	-2.21417	1.71	0.0233	0.289	0.0136257	0.169006	12.4034
4.8	-2.20205	1.7	0.0232	0.288	0.0136471	0.169412	12.4138
4.8	-2.18994	1.7	0.023	0.287	0.0135294	0.168824	12.4783
4.8	-2.17786	1.67	0.0225	0.288	0.0134731	0.172455	12.8
4.8	-2.16574	1.65	0.0224	0.289	0.0135758	0.175152	12.9018
4.8	-2.15367	1.63	0.0223	0.288	0.013681	0.176687	12.9148
4.8	-2.14155	1.63	0.0223	0.289	0.013681	0.177301	12.9596
4.8	-2.12948	1.6	0.0217	0.289	0.0135625	0.180625	13.318
4.8	-2.1174	1.59	0.0216	0.29	0.0135849	0.18239	13.4259
4.8	-2.10528	1.58	0.0216	0.29	0.0136709	0.183544	13.4259
4.8	-2.09316	1.56	0.0213	0.291	0.0136538	0.186538	13.662
4.8	-2.08105	1.55	0.0212	0.291	0.0136774	0.187742	13.7264
4.8	-2.06897	1.53	0.0208	0.291	0.0135948	0.190196	13.9904
4.8	-2.0569	1.52	0.0208	0.291	0.0136842	0.191447	13.9904
4.8	-2.04482	1.5	0.0205	0.291	0.0136667	0.194	14.1951
4.8	-2.03266	1.47	0.0201	0.291	0.0136735	0.197959	14.4776
4.8	-2.02059	1.46	0.0202	0.291	0.0138356	0.199315	14.4059
4.8	-2.00847	1.44	0.0197	0.292	0.0136806	0.202778	14.8223
4.8	-1.99639	1.44	0.0197	0.293	0.0136806	0.203472	14.8731
4.8	-1.98427	1.42	0.0194	0.292	0.013662	0.205634	15.0515
4.8	-1.9722	1.42	0.0194	0.291	0.013662	0.20493	15
4.8	-1.96008	1.4	0.0192	0.292	0.0137143	0.208571	15.2083
4.8	-1.94801	1.39	0.0189	0.293	0.0135971	0.210791	15.5026
4.8	-1.93589	1.36	0.0186	0.293	0.0136765	0.215441	15.7527
4.8	-1.92377	1.35	0.0184	0.293	0.0136296	0.217037	15.9239
4.8	-1.9117	1.33	0.0184	0.293	0.0138346	0.220301	15.9239
4.8	-1.89962	1.32	0.018	0.292	0.0136364	0.221212	16.2222
4.8	-1.8875	1.32	0.0179	0.294	0.0135606	0.222727	16.4246
4.8	-1.87538	1.29	0.0179	0.293	0.013876	0.227132	16.3687
4.8	-1.86331	1.26	0.0173	0.293	0.0137302	0.23254	16.9364
4.8	-1.85119	1.26	0.0173	0.293	0.0137302	0.23254	16.9364
4.8	-1.83912	1.26	0.0173	0.293	0.0137302	0.23254	16.9364
4.8	-1.827	1.25	0.0171	0.293	0.01368	0.2344	17.1345
4.8	-1.81492	1.23	0.017	0.294	0.0138211	0.239024	17.2941
4.8	-1.80281	1.22	0.0168	0.293	0.0137705	0.240164	17.4405
4.8	-1.79073	1.22	0.0168	0.294	0.0137705	0.240984	17.5
4.8	-1.77861	1.2	0.0165	0.294	0.01375	0.245	17.8182
4.8	-1.76654	1.17	0.0161	0.293	0.0137607	0.250427	18.1988
4.8	-1.75442	1.17	0.0162	0.294	0.0138462	0.251282	18.1481
4.8	-1.7423	1.16	0.0163	0.295	0.0140517	0.25431	18.0982
4.8	-1.73023	1.15	0.0157	0.294	0.0136522	0.255652	18.7261
4.8	-1.71815	1.14	0.0158	0.295	0.0138596	0.258772	18.6709
4.8	-1.70603	1.13	0.0156	0.294	0.0138053	0.260177	18.8462
4.8	-1.69392	1.11	0.0153	0.294	0.0137838	0.264865	19.2157
4.8	-1.68184	1.11	0.0154	0.294	0.0138739	0.264865	19.0909
4.8	-1.66972	1.1	0.0151	0.295	0.0137273	0.268182	19.5364
4.8	-1.65765	1.09	0.0151	0.295	0.0138532	0.270642	19.5364
4.8	-1.64557	1.09	0.015	0.294	0.0137615	0.269725	19.6
4.8	-1.63346	1.07	0.0147	0.294	0.0137383	0.274766	20
4.8	-1.62129	1.06	0.0147	0.294	0.0138679	0.277358	20
4.8	-1.60926	1.05	0.0146	0.294	0.0139048	0.28	20.137
4.8	-1.59714	1.04	0.0144	0.294	0.0138462	0.282692	20.4167
4.8	-1.58503	1.02	0.0144	0.293	0.0141176	0.287255	20.3472
4.8	-1.57295	1.01	0.0139	0.294	0.0137624	0.291089	21.1511
4.8	-1.56088	1	0.0137	0.294	0.0137	0.294	21.4599
4.8	-1.54876	0.987	0.0138	0.294	0.0139818	0.297872	21.3043
4.8	-1.53668	0.977	0.0136	0.294	0.0139202	0.300921	21.6176
4.8	-1.52457	0.968	0.0133	0.293	0.0137397	0.302686	22.0301
4.8	-1.51245	0.948	0.0131	0.293	0.0138186	0.309072	22.3664
4.8	-1.50037	0.938	0.013	0.292	0.0138593	0.311301	22.4615
4.8	-1.48825	0.935	0.013	0.293	0.0139037	0.313369	22.5385
4.8	-1.47618	0.924	0.0128	0.293	0.0138528	0.3171	22.8906
4.8	-1.46406	0.907	0.0126	0.293	0.013892	0.323043	23.254
4.8	-1.45199	0.907	0.0127	0.292	0.0140022	0.32194	22.9921
4.8	-1.43991	0.906	0.0127	0.292	0.0140177	0.322296	22.9921
4.8	-1.42779	0.892	0.0125	0.293	0.0140135	0.328475	23.44
4.8	-1.41568	0.876	0.0122	0.292	0.0139269	0.333333	23.9344
4.8	-1.4036	0.875	0.0123	0.292	0.0140571	0.333714	23.7398
4.8	-1.39148	0.867	0.0121	0.292	0.0139562	0.336794	24.1322
4.8	-1.37941	0.85	0.0118	0.292	0.0138824	0.343529	24.7458
4.8	-1.36729	0.848	0.0117	0.292	0.0137972	0.34434	24.9573
4.8	-1.35517	0.846	0.0118	0.292	0.013948	0.345154	24.7458
4.8	-1.3431	0.836	0.0116	0.292	0.0138756	0.349282	25.1724
4.8	-1.33098	0.83	0.0115	0.292	0.0138554	0.351807	25.3913
4.8	-1.3189	0.824	0.0115	0.291	0.0139563	0.353155	25.3043
4.8	-1.30679	0.814	0.0114	0.291	0.0140049	0.357494	25.5263
4.8	-1.29471	0.805	0.0113	0.291	0.0140373	0.361491	25.7522
4.8	-1.28259	0.793	0.0111	0.29	0.0139975	0.3657	26.1261
4.8	-1.27052	0.787	0.0109	0.29	0.0138501	0.368488	26.6055
4.8	-1.2584	0.781	0.011	0.29	0.0140845	0.371319	26.3636
4.8	-1.24628	0.772	0.0108	0.29	0.0139896	0.375648	26.8519
4.8	-1.23421	0.766	0.0108	0.29	0.0140992	0.37859	26.8519
4.8	-1.22209	0.761	0.0106	0.289	0.013929	0.379763	27.2642
4.8	-1.21002	0.755	0.0106	0.289	0.0140397	0.382781	27.2642
4.8	-1.19794	0.746	0.0103	0.289	0.013807	0.387399	28.0583
4.8	-1.18582	0.744	0.0104	0.29	0.0139785	0.389785	27.8846
4.8	-1.1737	0.743	0.0104	0.289	0.0139973	0.388964	27.7885
4.8	-1.16163	0.731	0.0103	0.288	0.0140903	0.393981	27.9612
4.8	-1.14951	0.722	0.0101	0.289	0.0139889	0.400277	28.6139
4.8	-1.13744	0.718	0.00992	0.288	0.0138162	0.401114	29.0323
4.8	-1.12532	0.712	0.01	0.288	0.0140449	0.404494	28.8
4.8	-1.11324	0.707	0.0101	0.288	0.0142857	0.407355	28.5149
4.8	-1.10113	0.704	0.00984	0.288	0.0139773	0.409091	29.2683
4.8	-1.08901	0.701	0.00989	0.288	0.0141084	0.410842	29.1203
4.8	-1.07693	0.698	0.00981	0.288	0.0140544	0.412607	29.3578
4.8	-1.06481	0.691	0.00977	0.288	0.0141389	0.416787	29.478
4.8	-1.05274	0.688	0.00973	0.288	0.0141424	0.418605	29.5992
4.8	-1.04067	0.686	0.00947	0.288	0.0138047	0.419825	30.4118
4.8	-1.02855	0.679	0.00955	0.287	0.0140648	0.42268	30.0524
4.8	-1.01643	0.673	0.00953	0.288	0.0141605	0.427935	30.2204
4.8	-1.00435	0.669	0.00935	0.287	0.0139761	0.428999	30.6952
4.8	-0.992235	0.66	0.0093	0.287	0.0140909	0.434848	30.8602
4.8	-0.980161	0.654	0.00917	0.287	0.0140214	0.438838	31.2977
4.8	-0.968042	0.654	0.00919	0.288	0.014052	0.440367	31.3384
4.8	-0.955924	0.653	0.00929	0.287	0.0142266	0.43951	30.8934
4.8	-0.94385	0.645	0.00908	0.286	0.0140775	0.443411	31.4978
4.8	-0.931775	0.636	0.00877	0.286	0.0137893	0.449686	32.6112
4.8	-0.919657	0.633	0.00896	0.286	0.0141548	0.451817	31.9196
4.8	-0.907538	0.626	0.00902	0.286	0.0144089	0.456869	31.7073
4.8	-0.895464	0.624	0.00863	0.286	0.0138301	0.458333	33.1402
4.8	-0.883345	0.624	0.00872	0.285	0.0139744	0.456731	32.6835
4.8	-0.871271	0.619	0.00865	0.286	0.0139742	0.462036	33.0636
4.8	-0.859152	0.616	0.00873	0.286	0.0141721	0.464286	32.7606
4.8	-0.847078	0.61	0.0086	0.286	0.0140984	0.468852	33.2558
4.8	-0.83496	0.607	0.00866	0.286	0.0142669	0.47117	33.0254
4.8	-0.822885	0.601	0.00868	0.285	0.0144426	0.47421	32.8341
4.8	-0.810767	0.597	0.00839	0.285	0.0140536	0.477387	33.969
4.8	-0.798648	0.596	0.00828	0.285	0.0138926	0.478188	34.4203
4.8	-0.786574	0.595	0.00842	0.285	0.0141513	0.478992	33.848
4.8	-0.774499	0.593	0.00852	0.286	0.0143676	0.482293	33.5681
4.8	-0.762425	0.588	0.00825	0.285	0.0140306	0.484694	34.5455
4.8	-0.750307	0.584	0.00814	0.284	0.0139384	0.486301	34.8894
4.8	-0.738188	0.582	0.00819	0.285	0.0140722	0.489691	34.7985
4.8	-0.726114	0.577	0.00821	0.285	0.0142288	0.493934	34.7138
4.8	-0.713995	0.573	0.00818	0.284	0.0142757	0.495637	34.7188
4.8	-0.701921	0.566	0.00812	0.285	0.0143463	0.503534	35.0985
4.8	-0.689802	0.564	0.00808	0.284	0.0143262	0.503546	35.1485
4.8	-0.677684	0.564	0.00795	0.285	0.0140957	0.505319	35.8491
4.8	-0.66561	0.559	0.00786	0.285	0.0140608	0.509839	36.2595
4.8	-0.653491	0.554	0.00792	0.285	0.014296	0.51444	35.9848
4.8	-0.641417	0.552	0.00789	0.284	0.0142935	0.514493	35.9949
4.8	-0.629298	0.547	0.0077	0.285	0.0140768	0.521024	37.013
4.8	-0.61718	0.542	0.0076	0.284	0.0140221	0.523985	37.3684
4.8	-0.605105	0.539	0.00768	0.284	0.0142486	0.526902	36.9792
4.8	-0.592987	0.534	0.00773	0.284	0.0144757	0.531835	36.74
4.8	-0.580913	0.531	0.00757	0.284	0.0142561	0.53484	37.5165
4.8	-0.568794	0.531	0.00742	0.284	0.0139736	0.53484	38.2749
4.8	-0.55672	0.527	0.00748	0.284	0.0141935	0.538899	37.9679
4.8	-0.544601	0.521	0.00761	0.284	0.0146065	0.545106	37.3193
4.8	-0.532527	0.517	0.00731	0.284	0.0141393	0.549323	38.8509
4.8	-0.520408	0.516	0.00742	0.284	0.0143798	0.550388	38.2749
4.8	-0.508334	0.513	0.0071	0.284	0.0138402	0.553606	40
4.8	-0.496216	0.507	0.00718	0.284	0.0141617	0.560158	39.5543
4.8	-0.484097	0.507	0.00719	0.284	0.0141815	0.560158	39.4993
4.8	-0.472023	0.504	0.0071	0.284	0.0140873	0.563492	40
4.8	-0.459948	0.5	0.00707	0.284	0.01414	0.568	40.1697
4.8	-0.44783	0.496	0.00721	0.284	0.0145363	0.572581	39.3897
4.8	-0.435755	0.496	0.00705	0.284	0.0142137	0.572581	40.2837
4.8	-0.423637	0.496	0.00701	0.284	0.0141331	0.572581	40.5136
4.8	-0.411518	0.496	0.00719	0.284	0.014496	0.572581	39.4993
4.8	-0.399444	0.496	0.00692	0.284	0.0139516	0.572581	41.0405
4.8	-0.387326	0.495	0.00713	0.285	0.014404	0.575758	39.9719
4.8	-0.375251	0.495	0.00707	0.285	0.0142828	0.575758	40.3112
4.8	-0.363133	0.494	0.00703	0.285	0.0142308	0.576923	40.5405
4.8	-0.351058	0.494	0.0071	0.285	0.0143725	0.576923	40.1408
4.8	-0.33894	0.494	0.00702	0.285	0.0142105	0.576923	40.5983
4.8	-0.326866	0.495	0.00712	0.285	0.0143838	0.575758	40.0281
4.8	-0.314747	0.495	0.00714	0.285	0.0144242	0.575758	39.916
4.8	-0.302673	0.496	0.00696	0.285	0.0140323	0.574597	40.9483
4.8	-0.290554	0.496	0.00692	0.285	0.0139516	0.574597	41.185
4.8	-0.278436	0.496	0.00715	0.284	0.0144153	0.572581	39.7203
4.8	-0.266361	0.494	0.00718	0.285	0.0145344	0.576923	39.6936
4.8	-0.254243	0.493	0.00693	0.285	0.0140568	0.578093	41.1255
4.8	-0.242168	0.495	0.00695	0.284	0.0140404	0.573737	40.8633
4.8	-0.23005	0.496	0.00705	0.285	0.0142137	0.574597	40.4255
4.8	-0.217976	0.495	0.00713	0.285	0.014404	0.575758	39.9719
4.8	-0.205857	0.495	0.00742	0.285	0.0149899	0.575758	38.4097
4.8	-0.193783	0.496	0.00691	0.285	0.0139315	0.574597	41.2446
4.8	-0.181664	0.496	0.00711	0.285	0.0143347	0.574597	40.0844
4.8	-0.16959	0.497	0.00714	0.286	0.0143662	0.575453	40.056
4.8	-0.157471	0.496	0.00697	0.285	0.0140524	0.574597	40.8895
4.8	-0.145397	0.498	0.00711	0.285	0.0142771	0.572289	40.0844
4.8	-0.133279	0.498	0.00711	0.286	0.0142771	0.574297	40.225
4.8	-0.12116	0.496	0.00713	0.285	0.014375	0.574597	39.9719
4.8	-0.109086	0.496	0.00705	0.285	0.0142137	0.574597	40.4255
4.8	-0.0969673	0.496	0.00706	0.285	0.0142339	0.574597	40.3683
4.8	-0.0848929	0.497	0.00703	0.285	0.0141449	0.573441	40.5405
4.8	-0.0727744	0.497	0.0071	0.285	0.0142857	0.573441	40.1408
4.8	-0.0607	0.496	0.0069	0.285	0.0139113	0.574597	41.3043
4.6	-4.8968	0.65	0.00917	0.288	0.0141077	0.443077	31.4068
4.6	-4.88472	0.652	0.00909	0.289	0.0139417	0.443252	31.7932
4.6	-4.87259	0.652	0.00916	0.288	0.0140491	0.441718	31.441
4.6	-4.86047	0.654	0.00916	0.29	0.0140061	0.443425	31.6594
4.6	-4.84839	0.652	0.00921	0.289	0.0141258	0.443252	31.3789
4.6	-4.83626	0.656	0.00913	0.289	0.0139177	0.440549	31.6539
4.6	-4.82418	0.656	0.00918	0.289	0.0139939	0.440549	31.4815
4.6	-4.81205	0.654	0.00911	0.289	0.0139297	0.441896	31.7234
4.6	-4.79997	0.652	0.0091	0.289	0.0139571	0.443252	31.7582
4.6	-4.78785	0.653	0.0091	0.289	0.0139357	0.442573	31.7582
4.6	-4.77577	0.655	0.00919	0.288	0.0140305	0.439695	31.3384
4.6	-4.76364	0.656	0.00929	0.289	0.0141616	0.440549	31.1087
4.6	-4.75151	0.656	0.00919	0.289	0.0140091	0.440549	31.4472
4.6	-4.73943	0.656	0.00928	0.29	0.0141463	0.442073	31.25
4.6	-4.72735	0.656	0.0092	0.289	0.0140244	0.440549	31.413
4.6	-4.71523	0.652	0.00914	0.289	0.0140184	0.443252	31.6193
4.6	-4.70315	0.653	0.00922	0.288	0.0141194	0.441041	31.2364
4.6	-4.69102	0.655	0.00914	0.288	0.0139542	0.439695	31.5098
4.6	-4.67894	0.66	0.0092	0.288	0.0139394	0.436364	31.3043
4.6	-4.66677	0.666	0.00934	0.288	0.014024	0.432432	30.8351
4.6	-4.65469	0.675	0.00947	0.288	0.0140296	0.426667	30.4118
4.6	-4.64261	0.684	0.00963	0.289	0.0140789	0.422515	30.0104
4.6	-4.63048	0.692	0.0098	0.288	0.0141618	0.416185	29.3878
4.6	-4.6184	0.7	0.00966	0.288	0.0138	0.411429	29.8137
4.6	-4.60627	0.71	0.00994	0.288	0.014	0.405634	28.9738
4.6	-4.59419	0.72	0.0101	0.288	0.0140278	0.4	28.5149
4.6	-4.58207	0.729	0.0102	0.287	0.0139918	0.39369	28.1373
4.6	-4.56994	0.737	0.0104	0.287	0.0141113	0.389417	27.5962
4.6	-4.55786	0.748	0.0104	0.286	0.0139037	0.382353	27.5
4.6	-4.54578	0.758	0.0105	0.287	0.0138522	0.378628	27.3333
4.6	-4.53365	0.767	0.0106	0.287	0.0138201	0.374185	27.0755
4.6	-4.52157	0.782	0.0109	0.287	0.0139386	0.367008	26.3303
4.6	-4.50945	0.792	0.011	0.287	0.0138889	0.362374	26.0909
4.6	-4.49728	0.806	0.0112	0.286	0.0138958	0.354839	25.5357
4.6	-4.48524	0.816	0.0113	0.286	0.013848	0.35049	25.3097
4.6	-4.47316	0.816	0.0113	0.286	0.013848	0.35049	25.3097
4.6	-4.46103	0.827	0.0117	0.286	0.0141475	0.345828	24.4444
4.6	-4.44891	0.838	0.0116	0.286	0.0138425	0.341289	24.6552
4.6	-4.43683	0.839	0.0117	0.286	0.0139452	0.340882	24.4444
4.6	-4.4247	0.842	0.0117	0.286	0.0138955	0.339667	24.4444
4.6	-4.41262	0.854	0.0118	0.286	0.0138173	0.334895	24.2373
4.6	-4.40049	0.865	0.0121	0.285	0.0139884	0.32948	23.5537
4.6	-4.38837	0.87	0.012	0.286	0.0137931	0.328736	23.8333
4.6	-4.37629	0.878	0.0122	0.285	0.0138952	0.324601	23.3607
4.6	-4.36421	0.895	0.0124	0.285	0.0138547	0.318436	22.9839
4.6	-4.35208	0.903	0.0126	0.285	0.0139535	0.315615	22.619
4.6	-4.34	0.901	0.0125	0.285	0.0138735	0.316315	22.8
4.6	-4.32787	0.908	0.0127	0.285	0.0139868	0.313877	22.4409
4.6	-4.31579	0.927	0.0129	0.286	0.0139159	0.308522	22.1705
4.6	-4.30367	0.94	0.013	0.285	0.0138298	0.303191	21.9231
4.6	-4.29154	0.939	0.013	0.285	0.0138445	0.303514	21.9231
4.6	-4.27946	0.947	0.0131	0.286	0.0138332	0.302006	21.8321
4.6	-4.26733	0.957	0.0131	0.285	0.0136886	0.297806	21.7557
4.6	-4.25525	0.967	0.0133	0.285	0.0137539	0.294726	21.4286
4.6	-4.24313	0.97	0.0135	0.285	0.0139175	0.293814	21.1111
4.6	-4.231	0.986	0.0137	0.285	0.0138945	0.289047	20.8029
4.6	-4.21892	0.986	0.0136	0.285	0.0137931	0.289047	20.9559
4.6	-4.20684	0.991	0.0137	0.286	0.0138244	0.288597	20.8759
4.6	-4.19471	1.01	0.0137	0.285	0.0135644	0.282178	20.8029
4.6	-4.18263	1.01	0.0141	0.284	0.0139604	0.281188	20.1418
4.6	-4.17051	1.03	0.0142	0.284	0.0137864	0.275728	20
4.6	-4.15838	1.04	0.0144	0.284	0.0138462	0.273077	19.7222
4.6	-4.1463	1.04	0.0146	0.285	0.0140385	0.274038	19.5205
4.6	-4.13417	1.06	0.0144	0.284	0.0135849	0.267925	19.7222
4.6	-4.12209	1.07	0.0147	0.285	0.0137383	0.266355	19.3878
4.6	-4.10997	1.08	0.0149	0.285	0.0137963	0.263889	19.1275
4.6	-4.09784	1.1	0.0151	0.285	0.0137273	0.259091	18.8742
4.6	-4.08576	1.11	0.0151	0.283	0.0136036	0.254955	18.7417
4.6	-4.07363	1.11	0.0153	0.284	0.0137838	0.255856	18.5621
4.6	-4.06155	1.13	0.0156	0.284	0.0138053	0.251327	18.2051
4.6	-4.04943	1.13	0.0155	0.285	0.0137168	0.252212	18.3871
4.6	-4.03735	1.13	0.0155	0.283	0.0137168	0.250442	18.2581
4.6	-4.02522	1.13	0.0156	0.283	0.0138053	0.250442	18.141
4.6	-4.0131	1.14	0.0156	0.283	0.0136842	0.248246	18.141
4.6	-4.00106	1.15	0.0158	0.283	0.0137391	0.246087	17.9114
4.6	-3.98893	1.17	0.016	0.284	0.0136752	0.242735	17.75
4.6	-3.97681	1.19	0.0163	0.283	0.0136975	0.237815	17.362
4.6	-3.96473	1.2	0.0164	0.283	0.0136667	0.235833	17.2561
4.6	-3.9526	1.22	0.0166	0.283	0.0136066	0.231967	17.0482
4.6	-3.94052	1.23	0.0167	0.284	0.0135772	0.230894	17.006
4.6	-3.92839	1.25	0.0172	0.283	0.01376	0.2264	16.4535
4.6	-3.91627	1.28	0.0174	0.283	0.0135937	0.221094	16.2644
4.6	-3.90419	1.29	0.0178	0.284	0.0137984	0.220155	15.9551
4.6	-3.89206	1.3	0.0178	0.283	0.0136923	0.217692	15.8989
4.6	-3.87998	1.33	0.0181	0.282	0.013609	0.21203	15.5801
4.6	-3.8679	1.35	0.0182	0.284	0.0134815	0.21037	15.6044
4.6	-3.85577	1.36	0.0185	0.283	0.0136029	0.208088	15.2973
4.6	-3.84369	1.38	0.0188	0.282	0.0136232	0.204348	15
4.6	-3.83157	1.4	0.0191	0.283	0.0136429	0.202143	14.8168
4.6	-3.81944	1.41	0.0192	0.283	0.013617	0.200709	14.7396
4.6	-3.80736	1.41	0.0192	0.283	0.013617	0.200709	14.7396
4.6	-3.79528	1.42	0.0194	0.282	0.013662	0.198592	14.5361
4.6	-3.78315	1.44	0.0196	0.283	0.0136111	0.196528	14.4388
4.6	-3.77103	1.47	0.02	0.283	0.0136054	0.192517	14.15
4.6	-3.75895	1.51	0.0204	0.282	0.0135099	0.186755	13.8235
4.6	-3.74682	1.54	0.021	0.283	0.0136364	0.183766	13.4762
4.6	-3.73469	1.54	0.0209	0.283	0.0135714	0.183766	13.5407
4.6	-3.72261	1.54	0.021	0.284	0.0136364	0.184416	13.5238
4.6	-3.71053	1.58	0.0215	0.282	0.0136076	0.178481	13.1163
4.6	-3.69841	1.6	0.0217	0.281	0.0135625	0.175625	12.9493
4.6	-3.68628	1.61	0.0219	0.282	0.0136025	0.175155	12.8767
4.6	-3.6742	1.62	0.0219	0.281	0.0135185	0.173457	12.8311
4.6	-3.66207	1.64	0.0222	0.282	0.0135366	0.171951	12.7027
4.6	-3.64995	1.67	0.0228	0.282	0.0136527	0.168862	12.3684
4.6	-3.63787	1.7	0.0229	0.281	0.0134706	0.165294	12.2707
4.6	-3.62579	1.74	0.0236	0.282	0.0135632	0.162069	11.9492
4.6	-3.61366	1.77	0.0239	0.283	0.0135028	0.159887	11.841
4.6	-3.60158	1.78	0.024	0.282	0.0134831	0.158427	11.75
4.6	-3.58945	1.78	0.0241	0.283	0.0135393	0.158989	11.7427
4.6	-3.57737	1.81	0.0247	0.282	0.0136464	0.155801	11.417
4.6	-3.56525	1.83	0.0248	0.283	0.0135519	0.154645	11.4113
4.6	-3.55312	1.83	0.0247	0.283	0.0134973	0.154645	11.4575
4.6	-3.54104	1.84	0.0248	0.282	0.0134783	0.153261	11.371
4.6	-3.52896	1.87	0.0252	0.282	0.0134759	0.150802	11.1905
4.6	-3.51683	1.91	0.0256	0.282	0.0134031	0.147644	11.0156
4.6	-3.50471	1.94	0.0263	0.283	0.0135567	0.145876	10.7605
4.6	-3.49258	1.95	0.0264	0.283	0.0135385	0.145128	10.7197
4.6	-3.4805	1.97	0.0265	0.282	0.0134518	0.143147	10.6415
4.6	-3.46842	2.01	0.027	0.282	0.0134328	0.140299	10.4444
4.6	-3.45629	2.01	0.0272	0.281	0.0135323	0.139801	10.3309
4.6	-3.44421	2.02	0.0272	0.282	0.0134653	0.139604	10.3676
4.6	-3.43209	2.05	0.0276	0.283	0.0134634	0.138049	10.2536
4.6	-3.42001	2.07	0.0277	0.282	0.0133816	0.136232	10.1805
4.6	-3.40788	2.1	0.0281	0.281	0.013381	0.13381	10
4.6	-3.39575	2.13	0.0286	0.281	0.0134272	0.131925	9.82517
4.6	-3.38367	2.14	0.0288	0.281	0.0134579	0.131308	9.75694
4.6	-3.37155	2.17	0.0293	0.281	0.0135023	0.129493	9.59044
4.6	-3.35947	2.18	0.0294	0.282	0.0134862	0.129358	9.59184
4.6	-3.34734	2.2	0.0295	0.283	0.0134091	0.128636	9.59322
4.6	-3.33526	2.24	0.0299	0.282	0.0133482	0.125893	9.43144
4.6	-3.32318	2.24	0.0299	0.281	0.0133482	0.125446	9.39799
4.6	-3.31101	2.24	0.0299	0.282	0.0133482	0.125893	9.43144
4.6	-3.29893	2.27	0.0305	0.282	0.0134361	0.124229	9.2459
4.6	-3.2868	2.29	0.0308	0.282	0.0134498	0.123144	9.15584
4.6	-3.27472	2.32	0.031	0.283	0.0133621	0.121983	9.12903
4.6	-3.26264	2.33	0.0313	0.281	0.0134335	0.120601	8.97764
4.6	-3.25051	2.36	0.0317	0.281	0.0134322	0.119068	8.86435
4.6	-3.23839	2.38	0.0318	0.281	0.0133613	0.118067	8.83648
4.6	-3.22631	2.38	0.0318	0.28	0.0133613	0.117647	8.80503
4.6	-3.21423	2.41	0.0322	0.281	0.013361	0.116598	8.72671
4.6	-3.2021	2.43	0.0325	0.281	0.0133745	0.115638	8.64615
4.6	-3.19002	2.44	0.0328	0.282	0.0134426	0.115574	8.59756
4.6	-3.17789	2.45	0.0327	0.281	0.0133469	0.114694	8.59327
4.6	-3.16581	2.45	0.0329	0.281	0.0134286	0.114694	8.54103
4.6	-3.15364	2.48	0.0333	0.281	0.0134274	0.113306	8.43844
4.6	-3.14156	2.51	0.0335	0.28	0.0133466	0.111554	8.35821
4.6	-3.12948	2.52	0.0338	0.28	0.0134127	0.111111	8.28402
4.6	-3.1174	2.54	0.0341	0.28	0.0134252	0.110236	8.21114
4.6	-3.10527	2.56	0.0344	0.281	0.0134375	0.109766	8.1686
4.6	-3.09315	2.57	0.0344	0.281	0.0133852	0.109339	8.1686
4.6	-3.08107	2.58	0.0347	0.28	0.0134496	0.108527	8.06916
4.6	-3.06894	2.6	0.0348	0.28	0.0133846	0.107692	8.04598
4.6	-3.05681	2.62	0.0351	0.28	0.0133969	0.10687	7.97721
4.6	-3.04473	2.63	0.0352	0.28	0.013384	0.106464	7.95455
4.6	-3.03261	2.64	0.0352	0.28	0.0133333	0.106061	7.95455
4.6	-3.02053	2.65	0.0355	0.281	0.0133962	0.106038	7.91549
4.6	-3.0084	2.65	0.0355	0.281	0.0133962	0.106038	7.91549
4.6	-2.99632	2.66	0.0355	0.281	0.0133459	0.105639	7.91549
4.6	-2.98419	2.67	0.0356	0.281	0.0133333	0.105243	7.89326
4.6	-2.97207	2.67	0.0356	0.28	0.0133333	0.104869	7.86517
4.6	-2.95999	2.69	0.0358	0.281	0.0133086	0.104461	7.84916
4.6	-2.94791	2.68	0.0357	0.281	0.0133209	0.104851	7.87115
4.6	-2.93578	2.68	0.0358	0.28	0.0133582	0.104478	7.82123
4.6	-2.9237	2.69	0.036	0.282	0.0133829	0.104833	7.83333
4.6	-2.91162	2.68	0.0359	0.281	0.0133955	0.104851	7.8273
4.6	-2.89945	2.68	0.0356	0.281	0.0132836	0.104851	7.89326
4.6	-2.88737	2.69	0.0357	0.282	0.0132714	0.104833	7.89916
4.6	-2.87529	2.69	0.036	0.281	0.0133829	0.104461	7.80556
4.6	-2.86316	2.68	0.0359	0.28	0.0133955	0.104478	7.79944
4.6	-2.85108	2.68	0.0359	0.281	0.0133955	0.104851	7.8273
4.6	-2.83895	2.69	0.036	0.282	0.0133829	0.104833	7.83333
4.6	-2.82687	2.68	0.0357	0.282	0.0133209	0.105224	7.89916
4.6	-2.81475	2.67	0.0357	0.281	0.0133708	0.105243	7.87115
4.6	-2.80262	2.67	0.0357	0.281	0.0133708	0.105243	7.87115
4.6	-2.79054	2.66	0.0356	0.282	0.0133835	0.106015	7.92135
4.6	-2.77841	2.66	0.0355	0.281	0.0133459	0.105639	7.91549
4.6	-2.76633	2.65	0.0354	0.281	0.0133585	0.106038	7.93785
4.6	-2.75421	2.64	0.0352	0.282	0.0133333	0.106818	8.01136
4.6	-2.74208	2.63	0.0353	0.282	0.0134221	0.107224	7.98867
4.6	-2.73	2.61	0.0349	0.283	0.0133716	0.108429	8.10888
4.6	-2.71792	2.6	0.0347	0.282	0.0133462	0.108462	8.1268
4.6	-2.70579	2.6	0.0347	0.282	0.0133462	0.108462	8.1268
4.6	-2.69367	2.58	0.0346	0.282	0.0134109	0.109302	8.15029
4.6	-2.68159	2.58	0.0348	0.282	0.0134884	0.109302	8.10345
4.6	-2.66946	2.56	0.0344	0.282	0.0134375	0.110156	8.19767
4.6	-2.65738	2.55	0.034	0.283	0.0133333	0.11098	8.32353
4.6	-2.6453	2.53	0.0337	0.283	0.0133202	0.111858	8.39763
4.6	-2.63313	2.51	0.0336	0.283	0.0133865	0.112749	8.42262
4.6	-2.62105	2.48	0.0331	0.282	0.0133468	0.11371	8.51964
4.6	-2.60897	2.46	0.033	0.284	0.0134146	0.115447	8.60606
4.6	-2.59684	2.45	0.0329	0.284	0.0134286	0.115918	8.63222
4.6	-2.58471	2.44	0.0327	0.284	0.0134016	0.116393	8.68502
4.6	-2.57263	2.42	0.0326	0.284	0.0134711	0.117355	8.71166
4.6	-2.56055	2.42	0.0327	0.283	0.0135124	0.116942	8.65443
4.6	-2.54843	2.41	0.0321	0.284	0.0133195	0.117842	8.84735
4.6	-2.5363	2.39	0.0321	0.284	0.013431	0.118828	8.84735
4.6	-2.52422	2.37	0.0319	0.284	0.0134599	0.119831	8.90282
4.6	-2.51209	2.34	0.0315	0.285	0.0134615	0.121795	9.04762
4.6	-2.50001	2.32	0.0312	0.284	0.0134483	0.122414	9.10256
4.6	-2.48793	2.31	0.031	0.284	0.0134199	0.122944	9.16129
4.6	-2.47576	2.31	0.0311	0.286	0.0134632	0.12381	9.19614
4.6	-2.46368	2.28	0.0307	0.285	0.0134649	0.125	9.28339
4.6	-2.45155	2.25	0.0302	0.285	0.0134222	0.126667	9.43709
4.6	-2.43947	2.26	0.0304	0.286	0.0134513	0.126549	9.40789
4.6	-2.42735	2.24	0.0301	0.285	0.0134375	0.127232	9.46844
4.6	-2.41527	2.21	0.0298	0.287	0.0134842	0.129864	9.63087
4.6	-2.40319	2.18	0.0293	0.286	0.0134404	0.131193	9.76109
4.6	-2.39106	2.15	0.0288	0.287	0.0133953	0.133488	9.96528
4.6	-2.37893	2.12	0.0288	0.287	0.0135849	0.135377	9.96528
4.6	-2.36685	2.12	0.0283	0.287	0.0133491	0.135377	10.1413
4.6	-2.35473	2.1	0.0283	0.288	0.0134762	0.137143	10.1767
4.6	-2.34265	2.08	0.028	0.289	0.0134615	0.138942	10.3214
4.6	-2.33052	2.05	0.0276	0.289	0.0134634	0.140976	10.471
4.6	-2.3184	2.03	0.0272	0.289	0.013399	0.142365	10.625
4.6	-2.30631	2.02	0.0272	0.289	0.0134653	0.143069	10.625
4.6	-2.29423	2.01	0.0271	0.29	0.0134826	0.144279	10.7011
4.6	-2.28211	1.99	0.0268	0.291	0.0134673	0.146231	10.8582
4.6	-2.27003	1.96	0.0265	0.29	0.0135204	0.147959	10.9434
4.6	-2.2579	1.94	0.0264	0.29	0.0136082	0.149485	10.9848
4.6	-2.24582	1.91	0.0261	0.29	0.0136649	0.151832	11.1111
4.6	-2.23369	1.89	0.0255	0.292	0.0134921	0.154497	11.451
4.6	-2.22157	1.87	0.0253	0.292	0.0135294	0.15615	11.5415
4.6	-2.20949	1.85	0.0251	0.292	0.0135676	0.157838	11.6335
4.6	-2.19736	1.81	0.0245	0.291	0.0135359	0.160773	11.8776
4.6	-2.18528	1.83	0.0248	0.292	0.0135519	0.159563	11.7742
4.6	-2.1732	1.8	0.0245	0.292	0.0136111	0.162222	11.9184
4.6	-2.16107	1.77	0.0241	0.292	0.0136158	0.164972	12.1162
4.6	-2.14895	1.75	0.0237	0.292	0.0135429	0.166857	12.3207
4.6	-2.13687	1.72	0.0232	0.293	0.0134884	0.170349	12.6293
4.6	-2.12474	1.7	0.023	0.293	0.0135294	0.172353	12.7391
4.6	-2.11261	1.68	0.0227	0.294	0.0135119	0.175	12.9515
4.6	-2.10053	1.66	0.0226	0.293	0.0136145	0.176506	12.9646
4.6	-2.08841	1.67	0.0228	0.294	0.0136527	0.176048	12.8947
4.6	-2.07633	1.66	0.0226	0.294	0.0136145	0.177108	13.0088
4.6	-2.0642	1.61	0.0219	0.293	0.0136025	0.181988	13.379
4.6	-2.05212	1.6	0.0218	0.293	0.013625	0.183125	13.4404
4.6	-2.03999	1.59	0.0217	0.293	0.0136478	0.184277	13.5023
4.6	-2.02791	1.57	0.0214	0.294	0.0136306	0.187261	13.7383
4.6	-2.01579	1.53	0.0209	0.294	0.0136601	0.192157	14.067
4.6	-2.00371	1.52	0.0208	0.295	0.0136842	0.194079	14.1827
4.6	-1.99158	1.5	0.0204	0.295	0.0136	0.196667	14.4608
4.6	-1.9795	1.48	0.0203	0.295	0.0137162	0.199324	14.532
4.6	-1.96742	1.48	0.0201	0.295	0.0135811	0.199324	14.6766
4.6	-1.95525	1.49	0.0202	0.295	0.013557	0.197987	14.604
4.6	-1.94317	1.46	0.0199	0.294	0.0136301	0.20137	14.7739
4.6	-1.93109	1.43	0.0194	0.294	0.0135664	0.205594	15.1546
4.6	-1.91896	1.42	0.0194	0.295	0.013662	0.207746	15.2062
4.6	-1.90688	1.39	0.019	0.295	0.0136691	0.21223	15.5263
4.6	-1.89475	1.37	0.0188	0.295	0.0137226	0.215328	15.6915
4.6	-1.88263	1.34	0.0186	0.295	0.0138806	0.220149	15.8602
4.6	-1.87055	1.34	0.0183	0.295	0.0136567	0.220149	16.1202
4.6	-1.85842	1.32	0.0181	0.294	0.0137121	0.222727	16.2431
4.6	-1.84634	1.3	0.0178	0.294	0.0136923	0.226154	16.5169
4.6	-1.83426	1.29	0.0177	0.295	0.0137209	0.228682	16.6667
4.6	-1.82213	1.29	0.0176	0.295	0.0136434	0.228682	16.7614
4.6	-1.81001	1.28	0.0177	0.295	0.0138281	0.230469	16.6667
4.6	-1.79793	1.25	0.0172	0.294	0.01376	0.2352	17.093
4.6	-1.7858	1.24	0.0171	0.294	0.0137903	0.237097	17.193
4.6	-1.77372	1.25	0.0171	0.295	0.01368	0.236	17.2515
4.6	-1.76159	1.23	0.0169	0.295	0.0137398	0.239837	17.4556
4.6	-1.74951	1.21	0.0167	0.294	0.0138017	0.242975	17.6048
4.6	-1.73739	1.21	0.0167	0.294	0.0138017	0.242975	17.6048
4.6	-1.72526	1.19	0.0164	0.294	0.0137815	0.247059	17.9268
4.6	-1.71318	1.18	0.0163	0.294	0.0138136	0.249153	18.0368
4.6	-1.70105	1.16	0.0161	0.294	0.0138793	0.253448	18.2609
4.6	-1.68897	1.16	0.016	0.294	0.0137931	0.253448	18.375
4.6	-1.67689	1.15	0.0159	0.295	0.0138261	0.256522	18.5535
4.6	-1.66477	1.12	0.0154	0.294	0.01375	0.2625	19.0909
4.6	-1.65264	1.12	0.0154	0.294	0.01375	0.2625	19.0909
4.6	-1.64056	1.12	0.0154	0.294	0.01375	0.2625	19.0909
4.6	-1.62843	1.1	0.0151	0.293	0.0137273	0.266364	19.404
4.6	-1.61635	1.09	0.015	0.293	0.0137615	0.268807	19.5333
4.6	-1.60423	1.07	0.0148	0.293	0.0138318	0.273832	19.7973
4.6	-1.5921	1.06	0.0147	0.293	0.0138679	0.276415	19.932
4.6	-1.58002	1.04	0.0145	0.292	0.0139423	0.280769	20.1379
4.6	-1.56794	1.03	0.0144	0.293	0.0139806	0.284466	20.3472
4.6	-1.55581	1.03	0.0143	0.293	0.0138835	0.284466	20.4895
4.6	-1.54369	1.02	0.0143	0.292	0.0140196	0.286275	20.4196
4.6	-1.53161	1.01	0.0137	0.292	0.0135644	0.289109	21.3139
4.6	-1.51948	0.993	0.0139	0.292	0.013998	0.294058	21.0072
4.6	-1.5074	0.981	0.0137	0.292	0.0139653	0.297655	21.3139
4.6	-1.49527	0.964	0.0133	0.291	0.0137967	0.301867	21.8797
4.6	-1.48319	0.958	0.0133	0.292	0.0138831	0.304802	21.9549
4.6	-1.47107	0.95	0.0133	0.292	0.014	0.307368	21.9549
4.6	-1.45899	0.946	0.0131	0.291	0.0138478	0.307611	22.2137
4.6	-1.44686	0.935	0.0131	0.291	0.0140107	0.31123	22.2137
4.6	-1.43478	0.926	0.0128	0.292	0.0138229	0.315335	22.8125
4.6	-1.42265	0.923	0.0128	0.292	0.0138678	0.31636	22.8125
4.6	-1.41057	0.912	0.0127	0.29	0.0139254	0.317982	22.8346
4.6	-1.39845	0.901	0.0126	0.291	0.0139845	0.322974	23.0952
4.6	-1.38632	0.89	0.0124	0.291	0.0139326	0.326966	23.4677
4.6	-1.37424	0.881	0.0124	0.291	0.0140749	0.330306	23.4677
4.6	-1.36211	0.867	0.0121	0.29	0.0139562	0.334487	23.9669
4.6	-1.35003	0.862	0.0119	0.29	0.0138051	0.336427	24.3697
4.6	-1.33791	0.862	0.0118	0.29	0.0136891	0.336427	24.5763
4.6	-1.32583	0.855	0.0121	0.29	0.014152	0.339181	23.9669
4.6	-1.3137	0.846	0.0118	0.29	0.013948	0.34279	24.5763
4.6	-1.30158	0.833	0.0117	0.29	0.0140456	0.348139	24.7863
4.6	-1.28949	0.825	0.0115	0.289	0.0139394	0.350303	25.1304
4.6	-1.27737	0.817	0.0115	0.289	0.0140759	0.353733	25.1304
4.6	-1.26529	0.804	0.0113	0.289	0.0140547	0.359453	25.5752
4.6	-1.25316	0.792	0.011	0.288	0.0138889	0.363636	26.1818
4.6	-1.24108	0.788	0.011	0.288	0.0139594	0.365482	26.1818
4.6	-1.22895	0.773	0.0107	0.288	0.0138422	0.372574	26.9159
4.6	-1.21687	0.766	0.0108	0.288	0.0140992	0.375979	26.6667
4.6	-1.20479	0.763	0.0107	0.287	0.0140236	0.376147	26.8224
4.6	-1.19267	0.753	0.0106	0.287	0.014077	0.381142	27.0755
4.6	-1.18054	0.748	0.0103	0.287	0.0137701	0.38369	27.8641
4.6	-1.16846	0.749	0.0105	0.287	0.0140187	0.383178	27.3333
4.6	-1.15638	0.745	0.0104	0.286	0.0139597	0.383893	27.5
4.6	-1.14425	0.739	0.0104	0.287	0.0140731	0.388363	27.5962
4.6	-1.13213	0.728	0.0102	0.286	0.014011	0.392857	28.0392
4.6	-1.12	0.72	0.0102	0.286	0.0141667	0.397222	28.0392
4.6	-1.10792	0.712	0.00988	0.286	0.0138764	0.401685	28.9474
4.6	-1.09579	0.707	0.00998	0.286	0.014116	0.404526	28.6573
4.6	-1.08371	0.707	0.00992	0.286	0.0140311	0.404526	28.8306
4.6	-1.07163	0.701	0.0097	0.286	0.0138374	0.407989	29.4845
4.6	-1.05951	0.696	0.00979	0.285	0.0140661	0.409483	29.1113
4.6	-1.04738	0.689	0.00955	0.285	0.0138607	0.413643	29.8429
4.6	-1.0353	0.688	0.00963	0.285	0.0139971	0.414244	29.595
4.6	-1.02317	0.69	0.00966	0.286	0.014	0.414493	29.6066
4.6	-1.01109	0.677	0.00969	0.285	0.0143131	0.420975	29.4118
4.6	-0.998967	0.668	0.00935	0.284	0.013997	0.42515	30.3743
4.6	-0.986886	0.668	0.00944	0.284	0.0141317	0.42515	30.0847
4.6	-0.97476	0.662	0.0092	0.284	0.0138973	0.429003	30.8696
4.6	-0.962635	0.655	0.00922	0.285	0.0140763	0.435115	30.9111
4.6	-0.950554	0.653	0.00927	0.284	0.014196	0.434916	30.6365
4.6	-0.938428	0.653	0.00928	0.284	0.0142113	0.434916	30.6034
4.6	-0.926347	0.649	0.00917	0.284	0.0141294	0.437596	30.9706
4.6	-0.914221	0.642	0.00914	0.284	0.0142368	0.442368	31.0722
4.6	-0.90214	0.635	0.00898	0.283	0.0141417	0.445669	31.5145
4.6	-0.890058	0.627	0.0089	0.283	0.0141946	0.451356	31.7978
4.6	-0.877933	0.624	0.00893	0.283	0.0143109	0.453526	31.6909
4.6	-0.865852	0.624	0.00884	0.283	0.0141667	0.453526	32.0136
4.6	-0.853726	0.621	0.0088	0.284	0.0141707	0.457327	32.2727
4.6	-0.841601	0.616	0.0087	0.283	0.0141234	0.459416	32.5287
4.6	-0.829519	0.61	0.00865	0.283	0.0141803	0.463934	32.7168
4.6	-0.817394	0.607	0.00864	0.282	0.0142339	0.46458	32.6389
4.6	-0.805312	0.603	0.00854	0.283	0.0141625	0.46932	33.1382
4.6	-0.793187	0.597	0.00844	0.283	0.0141374	0.474037	33.5308
4.6	-0.781061	0.595	0.00852	0.282	0.0143193	0.47395	33.0986
4.6	-0.76898	0.596	0.00849	0.283	0.014245	0.474832	33.3333
4.6	-0.756899	0.594	0.00827	0.283	0.0139226	0.476431	34.2201
4.6	-0.744773	0.59	0.00834	0.282	0.0141356	0.477966	33.8129
4.6	-0.732648	0.581	0.00819	0.282	0.0140964	0.48537	34.4322
4.6	-0.720566	0.577	0.00808	0.282	0.0140035	0.488735	34.901
4.6	-0.708441	0.576	0.00822	0.282	0.0142708	0.489583	34.3066
4.6	-0.69636	0.572	0.00804	0.282	0.0140559	0.493007	35.0746
4.6	-0.684234	0.569	0.00817	0.282	0.0143585	0.495606	34.5165
4.6	-0.672109	0.567	0.00803	0.282	0.0141623	0.497354	35.1183
4.6	-0.660027	0.561	0.00804	0.282	0.0143316	0.502674	35.0746
4.6	-0.647946	0.556	0.0078	0.281	0.0140288	0.505396	36.0256
4.6	-0.63582	0.55	0.00782	0.281	0.0142182	0.510909	35.9335
4.6	-0.623695	0.549	0.00777	0.281	0.014153	0.51184	36.1647
4.6	-0.611614	0.544	0.0079	0.281	0.0145221	0.516544	35.5696
4.6	-0.599532	0.54	0.00752	0.281	0.0139259	0.52037	37.367
4.6	-0.587407	0.538	0.00765	0.282	0.0142193	0.524164	36.8627
4.6	-0.575281	0.533	0.00762	0.281	0.0142964	0.527205	36.8766
4.6	-0.5632	0.529	0.00747	0.281	0.014121	0.531191	37.6171
4.6	-0.551074	0.527	0.00743	0.282	0.0140987	0.535104	37.9542
4.6	-0.538949	0.524	0.00755	0.281	0.0144084	0.53626	37.2185
4.6	-0.526867	0.519	0.00747	0.281	0.0143931	0.541426	37.6171
4.6	-0.514742	0.516	0.00744	0.281	0.0144186	0.544574	37.7688
4.6	-0.502661	0.511	0.00713	0.281	0.013953	0.549902	39.4109
4.6	-0.490535	0.507	0.00723	0.281	0.0142604	0.554241	38.8658
4.6	-0.478454	0.505	0.00721	0.281	0.0142772	0.556436	38.9736
4.6	-0.466328	0.504	0.00721	0.281	0.0143056	0.55754	38.9736
4.6	-0.454247	0.504	0.00718	0.282	0.014246	0.559524	39.2758
4.6	-0.442121	0.5	0.00715	0.281	0.0143	0.562	39.3007
4.6	-0.43004	0.497	0.00721	0.281	0.014507	0.565392	38.9736
4.6	-0.417915	0.494	0.00698	0.281	0.0141296	0.568826	40.2579
4.6	-0.405833	0.492	0.00706	0.281	0.0143496	0.571138	39.8017
4.6	-0.393752	0.492	0.00689	0.281	0.0140041	0.571138	40.7837
4.6	-0.381626	0.491	0.00705	0.281	0.0143585	0.572301	39.8582
4.6	-0.369501	0.492	0.00708	0.281	0.0143902	0.571138	39.6893
4.6	-0.357375	0.492	0.00699	0.281	0.0142073	0.571138	40.2003
4.6	-0.345294	0.491	0.00705	0.281	0.0143585	0.572301	39.8582
4.6	-0.333169	0.492	0.00703	0.281	0.0142886	0.571138	39.9716
4.6	-0.321087	0.491	0.00709	0.281	0.0144399	0.572301	39.6333
4.6	-0.309006	0.492	0.00689	0.281	0.0140041	0.571138	40.7837
4.6	-0.29688	0.492	0.00693	0.281	0.0140854	0.571138	40.5483
4.6	-0.284755	0.493	0.00711	0.281	0.0144219	0.56998	39.5218
4.6	-0.272673	0.491	0.00692	0.281	0.0140937	0.572301	40.6069
4.6	-0.260548	0.492	0.00692	0.281	0.014065	0.571138	40.6069
4.6	-0.248467	0.492	0.0072	0.281	0.0146341	0.571138	39.0278
4.6	-0.236341	0.493	0.00698	0.281	0.0141582	0.56998	40.2579
4.6	-0.22426	0.492	0.00689	0.281	0.0140041	0.571138	40.7837
4.6	-0.212134	0.491	0.00699	0.281	0.0142363	0.572301	40.2003
4.6	-0.200009	0.492	0.0071	0.281	0.0144309	0.571138	39.5775
4.6	-0.187927	0.493	0.00707	0.281	0.0143408	0.56998	39.7454
4.6	-0.175802	0.495	0.00721	0.282	0.0145657	0.569697	39.1123
4.6	-0.163721	0.494	0.00712	0.281	0.014413	0.568826	39.4663
4.6	-0.151639	0.493	0.00696	0.281	0.0141176	0.56998	40.3736
4.6	-0.139514	0.493	0.00698	0.282	0.0141582	0.572008	40.4011
4.6	-0.127432	0.493	0.00712	0.282	0.0144422	0.572008	39.6067
4.6	-0.115307	0.494	0.00693	0.282	0.0140283	0.57085	40.6926
4.6	-0.103181	0.492	0.00714	0.282	0.0145122	0.573171	39.4958
4.6	-0.0911	0.494	0.00703	0.282	0.0142308	0.57085	40.1138
4.4	-4.918	0.669	0.00951	0.291	0.0142152	0.434978	30.5994
4.4	-4.90588	0.667	0.00937	0.289	0.014048	0.433283	30.8431
4.4	-4.89381	0.669	0.00935	0.29	0.0139761	0.433483	31.016
4.4	-4.88169	0.671	0.00945	0.291	0.0140835	0.433681	30.7937
4.4	-4.86957	0.667	0.00927	0.29	0.0138981	0.434783	31.2837
4.4	-4.85749	0.667	0.00927	0.289	0.0138981	0.433283	31.1758
4.4	-4.84542	0.668	0.00946	0.29	0.0141617	0.434132	30.6554
4.4	-4.8333	0.67	0.00952	0.29	0.014209	0.432836	30.4622
4.4	-4.82122	0.667	0.0094	0.289	0.014093	0.433283	30.7447
4.4	-4.8091	0.668	0.00932	0.29	0.0139521	0.434132	31.1159
4.4	-4.79703	0.666	0.00936	0.29	0.0140541	0.435435	30.9829
4.4	-4.78491	0.667	0.00941	0.29	0.0141079	0.434783	30.8183
4.4	-4.77283	0.668	0.00932	0.29	0.0139521	0.434132	31.1159
4.4	-4.76071	0.671	0.00937	0.291	0.0139642	0.433681	31.0566
4.4	-4.74859	0.672	0.00947	0.291	0.0140923	0.433036	30.7286
4.4	-4.73652	0.667	0.00944	0.289	0.0141529	0.433283	30.6144
4.4	-4.72444	0.669	0.00956	0.29	0.01429	0.433483	30.3347
4.4	-4.71232	0.669	0.00926	0.29	0.0138416	0.433483	31.3175
4.4	-4.7002	0.669	0.00947	0.29	0.0141555	0.433483	30.623
4.4	-4.68813	0.671	0.0094	0.289	0.0140089	0.4307	30.7447
4.4	-4.67601	0.682	0.00953	0.289	0.0139736	0.423754	30.3253
4.4	-4.66393	0.684	0.00958	0.288	0.0140058	0.421053	30.0626
4.4	-4.65181	0.689	0.00968	0.288	0.0140493	0.417997	29.7521
4.4	-4.63974	0.705	0.00995	0.289	0.0141135	0.409929	29.0452
4.4	-4.62762	0.713	0.01	0.288	0.0140252	0.403927	28.8
4.4	-4.6155	0.724	0.0103	0.288	0.0142265	0.39779	27.9612
4.4	-4.60343	0.735	0.0102	0.288	0.0138776	0.391837	28.2353
4.4	-4.59131	0.741	0.0104	0.288	0.0140351	0.388664	27.6923
4.4	-4.57923	0.749	0.0104	0.288	0.0138852	0.384513	27.6923
4.4	-4.56716	0.757	0.0105	0.288	0.0138705	0.380449	27.4286
4.4	-4.55499	0.768	0.0108	0.287	0.0140625	0.373698	26.5741
4.4	-4.54292	0.781	0.0108	0.288	0.0138284	0.368758	26.6667
4.4	-4.53084	0.79	0.0111	0.287	0.0140506	0.363291	25.8559
4.4	-4.51877	0.801	0.0112	0.287	0.0139825	0.358302	25.625
4.4	-4.50665	0.809	0.0113	0.288	0.0139679	0.355995	25.4867
4.4	-4.49453	0.82	0.0113	0.287	0.0137805	0.35	25.3982
4.4	-4.48241	0.826	0.0116	0.287	0.0140436	0.347458	24.7414
4.4	-4.47033	0.83	0.0116	0.288	0.0139759	0.346988	24.8276
4.4	-4.45826	0.838	0.0117	0.288	0.0139618	0.343675	24.6154
4.4	-4.44614	0.85	0.0117	0.287	0.0137647	0.337647	24.5299
4.4	-4.43402	0.852	0.012	0.287	0.0140845	0.336854	23.9167
4.4	-4.42194	0.853	0.0118	0.287	0.0138335	0.33646	24.322
4.4	-4.40982	0.861	0.012	0.287	0.0139373	0.333333	23.9167
4.4	-4.39775	0.876	0.0122	0.286	0.0139269	0.326484	23.4426
4.4	-4.38563	0.878	0.0122	0.287	0.0138952	0.326879	23.5246
4.4	-4.37355	0.883	0.0122	0.287	0.0138165	0.325028	23.5246
4.4	-4.36148	0.894	0.0126	0.286	0.014094	0.319911	22.6984
4.4	-4.34936	0.908	0.0125	0.286	0.0137665	0.314978	22.88
4.4	-4.33724	0.909	0.0126	0.286	0.0138614	0.314631	22.6984
4.4	-4.32517	0.909	0.0127	0.286	0.0139714	0.314631	22.5197
4.4	-4.31305	0.917	0.0127	0.285	0.0138495	0.310796	22.4409
4.4	-4.30093	0.933	0.0129	0.286	0.0138264	0.306538	22.1705
4.4	-4.28885	0.943	0.0129	0.285	0.0136797	0.302227	22.093
4.4	-4.27673	0.957	0.0132	0.285	0.0137931	0.297806	21.5909
4.4	-4.26466	0.973	0.0135	0.286	0.0138746	0.293936	21.1852
4.4	-4.25258	0.975	0.0135	0.285	0.0138462	0.292308	21.1111
4.4	-4.24046	0.983	0.0136	0.285	0.0138352	0.289929	20.9559
4.4	-4.22834	0.993	0.0139	0.285	0.013998	0.287009	20.5036
4.4	-4.21622	0.998	0.0139	0.285	0.0139279	0.285571	20.5036
4.4	-4.20415	0.995	0.0138	0.285	0.0138693	0.286432	20.6522
4.4	-4.19207	1	0.0137	0.285	0.0137	0.285	20.8029
4.4	-4.17995	1.01	0.0141	0.285	0.0139604	0.282178	20.2128
4.4	-4.16788	1.03	0.0142	0.284	0.0137864	0.275728	20
4.4	-4.15576	1.04	0.0145	0.284	0.0139423	0.273077	19.5862
4.4	-4.14364	1.05	0.0146	0.283	0.0139048	0.269524	19.3836
4.4	-4.13156	1.07	0.0149	0.284	0.0139252	0.265421	19.0604
4.4	-4.11949	1.08	0.015	0.284	0.0138889	0.262963	18.9333
4.4	-4.10737	1.1	0.015	0.284	0.0136364	0.258182	18.9333
4.4	-4.09529	1.11	0.0154	0.284	0.0138739	0.255856	18.4416
4.4	-4.08317	1.13	0.0155	0.284	0.0137168	0.251327	18.3226
4.4	-4.07106	1.14	0.0156	0.283	0.0136842	0.248246	18.141
4.4	-4.05894	1.14	0.0156	0.284	0.0136842	0.249123	18.2051
4.4	-4.04686	1.15	0.0158	0.283	0.0137391	0.246087	17.9114
4.4	-4.03479	1.15	0.0157	0.283	0.0136522	0.246087	18.0255
4.4	-4.02267	1.16	0.0159	0.284	0.0137069	0.244828	17.8616
4.4	-4.01055	1.17	0.0163	0.284	0.0139316	0.242735	17.4233
4.4	-3.99847	1.19	0.0164	0.283	0.0137815	0.237815	17.2561
4.4	-3.9864	1.22	0.0167	0.283	0.0136885	0.231967	16.9461
4.4	-3.97428	1.24	0.0171	0.283	0.0137903	0.228226	16.5497
4.4	-3.96216	1.26	0.0171	0.283	0.0135714	0.224603	16.5497
4.4	-3.95008	1.26	0.0174	0.284	0.0138095	0.225397	16.3218
4.4	-3.93796	1.27	0.0175	0.283	0.0137795	0.222835	16.1714
4.4	-3.92589	1.28	0.0175	0.282	0.0136719	0.220312	16.1143
4.4	-3.91377	1.31	0.0178	0.282	0.0135878	0.215267	15.8427
4.4	-3.90169	1.33	0.0183	0.282	0.0137594	0.21203	15.4098
4.4	-3.88957	1.34	0.0182	0.282	0.0135821	0.210448	15.4945
4.4	-3.8775	1.37	0.0187	0.283	0.0136496	0.206569	15.1337
4.4	-3.86538	1.39	0.019	0.283	0.0136691	0.203597	14.8947
4.4	-3.8533	1.39	0.0189	0.283	0.0135971	0.203597	14.9735
4.4	-3.84118	1.42	0.0193	0.282	0.0135915	0.198592	14.6114
4.4	-3.82911	1.45	0.0196	0.282	0.0135172	0.194483	14.3878
4.4	-3.81699	1.46	0.0199	0.282	0.0136301	0.193151	14.1709
4.4	-3.80491	1.46	0.0199	0.283	0.0136301	0.193836	14.2211
4.4	-3.7928	1.48	0.0201	0.282	0.0135811	0.190541	14.0299
4.4	-3.78072	1.5	0.0203	0.282	0.0135333	0.188	13.8916
4.4	-3.7686	1.53	0.0208	0.282	0.0135948	0.184314	13.5577
4.4	-3.75648	1.55	0.0214	0.282	0.0138065	0.181935	13.1776
4.4	-3.74441	1.58	0.0217	0.282	0.0137342	0.178481	12.9954
4.4	-3.73229	1.59	0.0215	0.281	0.013522	0.17673	13.0698
4.4	-3.72017	1.6	0.0218	0.281	0.013625	0.175625	12.8899
4.4	-3.70809	1.63	0.0222	0.281	0.0136196	0.172393	12.6577
4.4	-3.69602	1.65	0.0224	0.282	0.0135758	0.170909	12.5893
4.4	-3.6839	1.67	0.0225	0.281	0.0134731	0.168263	12.4889
4.4	-3.67182	1.66	0.0225	0.281	0.0135542	0.169277	12.4889
4.4	-3.6597	1.69	0.0229	0.281	0.0135503	0.166272	12.2707
4.4	-3.64763	1.71	0.023	0.282	0.0134503	0.164912	12.2609
4.4	-3.63551	1.75	0.0237	0.28	0.0135429	0.16	11.8143
4.4	-3.62339	1.79	0.0243	0.281	0.0135754	0.156983	11.5638
4.4	-3.61131	1.81	0.0247	0.281	0.0136464	0.155249	11.3765
4.4	-3.59919	1.82	0.0245	0.281	0.0134615	0.154396	11.4694
4.4	-3.58712	1.81	0.0245	0.281	0.0135359	0.155249	11.4694
4.4	-3.57504	1.84	0.0251	0.281	0.0136413	0.152717	11.1952
4.4	-3.56292	1.88	0.0255	0.281	0.0135638	0.149468	11.0196
4.4	-3.5508	1.89	0.0256	0.281	0.013545	0.148677	10.9766
4.4	-3.53873	1.9	0.0256	0.282	0.0134737	0.148421	11.0156
4.4	-3.52661	1.93	0.026	0.281	0.0134715	0.145596	10.8077
4.4	-3.51453	1.96	0.0265	0.282	0.0135204	0.143878	10.6415
4.4	-3.50242	2	0.027	0.281	0.0135	0.1405	10.4074
4.4	-3.49034	2.03	0.0274	0.28	0.0134975	0.137931	10.219
4.4	-3.47822	2.06	0.0277	0.28	0.0134466	0.135922	10.1083
4.4	-3.46615	2.07	0.0278	0.28	0.01343	0.135266	10.0719
4.4	-3.45403	2.07	0.0278	0.28	0.01343	0.135266	10.0719
4.4	-3.44191	2.09	0.0281	0.281	0.013445	0.13445	10
4.4	-3.42983	2.11	0.0283	0.281	0.0134123	0.133175	9.92933
4.4	-3.41776	2.13	0.0288	0.282	0.0135211	0.132394	9.79167
4.4	-3.40564	2.18	0.0292	0.281	0.0133945	0.128899	9.62329
4.4	-3.39352	2.21	0.0295	0.281	0.0133484	0.127149	9.52542
4.4	-3.3814	2.23	0.0301	0.281	0.0134978	0.126009	9.33555
4.4	-3.36932	2.23	0.03	0.281	0.0134529	0.126009	9.36667
4.4	-3.3572	2.25	0.0301	0.282	0.0133778	0.125333	9.36877
4.4	-3.34513	2.29	0.0306	0.282	0.0133624	0.123144	9.21569
4.4	-3.33305	2.3	0.031	0.281	0.0134783	0.122174	9.06452
4.4	-3.32093	2.31	0.031	0.281	0.0134199	0.121645	9.06452
4.4	-3.30886	2.33	0.0313	0.28	0.0134335	0.120172	8.94569
4.4	-3.29674	2.35	0.0315	0.28	0.0134043	0.119149	8.88889
4.4	-3.28462	2.4	0.0321	0.282	0.013375	0.1175	8.78505
4.4	-3.27254	2.43	0.0327	0.283	0.0134568	0.116461	8.65443
4.4	-3.26043	2.46	0.033	0.281	0.0134146	0.114228	8.51515
4.4	-3.24835	2.48	0.0332	0.282	0.0133871	0.11371	8.49398
4.4	-3.23623	2.47	0.0331	0.28	0.0134008	0.11336	8.45921
4.4	-3.22416	2.5	0.0334	0.281	0.01336	0.1124	8.41317
4.4	-3.21204	2.52	0.0336	0.281	0.0133333	0.111508	8.3631
4.4	-3.19996	2.55	0.0342	0.281	0.0134118	0.110196	8.21637
4.4	-3.18784	2.57	0.0344	0.281	0.0133852	0.109339	8.1686
4.4	-3.17577	2.56	0.0342	0.282	0.0133594	0.110156	8.24561
4.4	-3.16365	2.59	0.0348	0.282	0.0134363	0.10888	8.10345
4.4	-3.15157	2.62	0.035	0.28	0.0133588	0.10687	8
4.4	-3.13945	2.64	0.0354	0.281	0.0134091	0.106439	7.93785
4.4	-3.12733	2.68	0.0358	0.281	0.0133582	0.104851	7.84916
4.4	-3.11526	2.69	0.036	0.281	0.0133829	0.104461	7.80556
4.4	-3.10314	2.7	0.036	0.281	0.0133333	0.104074	7.80556
4.4	-3.09106	2.71	0.0363	0.281	0.0133948	0.10369	7.74105
4.4	-3.07894	2.75	0.0366	0.282	0.0133091	0.102545	7.70492
4.4	-3.06687	2.75	0.0367	0.281	0.0133455	0.102182	7.65668
4.4	-3.05475	2.76	0.0369	0.28	0.0133696	0.101449	7.58808
4.4	-3.04263	2.76	0.0367	0.28	0.0132971	0.101449	7.62943
4.4	-3.03055	2.78	0.0371	0.28	0.0133453	0.100719	7.54717
4.4	-3.01848	2.79	0.0373	0.28	0.0133692	0.100358	7.5067
4.4	-3.00636	2.79	0.0373	0.28	0.0133692	0.100358	7.5067
4.4	-2.99428	2.81	0.0375	0.282	0.0133452	0.100356	7.52
4.4	-2.98216	2.81	0.0376	0.281	0.0133808	0.1	7.4734
4.4	-2.97009	2.82	0.0375	0.281	0.0132979	0.0996454	7.49333
4.4	-2.95797	2.81	0.0378	0.282	0.013452	0.100356	7.46032
4.4	-2.94585	2.81	0.0376	0.28	0.0133808	0.0996441	7.44681
4.4	-2.93378	2.82	0.0375	0.281	0.0132979	0.0996454	7.49333
4.4	-2.92166	2.82	0.0378	0.281	0.0134043	0.0996454	7.43386
4.4	-2.90958	2.83	0.0378	0.28	0.0133569	0.0989399	7.40741
4.4	-2.89746	2.83	0.0379	0.28	0.0133922	0.0989399	7.38786
4.4	-2.88534	2.83	0.0379	0.281	0.0133922	0.0992933	7.41425
4.4	-2.87327	2.84	0.038	0.281	0.0133803	0.0989437	7.39474
4.4	-2.86115	2.83	0.0377	0.281	0.0133216	0.0992933	7.45358
4.4	-2.84907	2.83	0.0378	0.282	0.0133569	0.0996466	7.46032
4.4	-2.83695	2.82	0.0377	0.281	0.0133688	0.0996454	7.45358
4.4	-2.82488	2.82	0.0376	0.281	0.0133333	0.0996454	7.4734
4.4	-2.8128	2.82	0.0377	0.281	0.0133688	0.0996454	7.45358
4.4	-2.80068	2.81	0.0376	0.281	0.0133808	0.1	7.4734
4.4	-2.78856	2.81	0.0375	0.282	0.0133452	0.100356	7.52
4.4	-2.77649	2.8	0.0374	0.28	0.0133571	0.1	7.48663
4.4	-2.76437	2.78	0.0371	0.281	0.0133453	0.101079	7.57412
4.4	-2.75229	2.78	0.0373	0.281	0.0134173	0.101079	7.53351
4.4	-2.74022	2.78	0.0373	0.283	0.0134173	0.101799	7.58713
4.4	-2.7281	2.76	0.0368	0.283	0.0133333	0.102536	7.69022
4.4	-2.71598	2.74	0.0368	0.282	0.0134307	0.10292	7.66304
4.4	-2.70386	2.74	0.0366	0.282	0.0133577	0.10292	7.70492
4.4	-2.69179	2.73	0.0366	0.283	0.0134066	0.103663	7.73224
4.4	-2.67971	2.72	0.0364	0.283	0.0133824	0.104044	7.77473
4.4	-2.66759	2.72	0.0364	0.283	0.0133824	0.104044	7.77473
4.4	-2.65547	2.7	0.0361	0.283	0.0133704	0.104815	7.83934
4.4	-2.6434	2.68	0.036	0.283	0.0134328	0.105597	7.86111
4.4	-2.63132	2.66	0.0356	0.283	0.0133835	0.106391	7.94944
4.4	-2.6192	2.63	0.0352	0.284	0.013384	0.107985	8.06818
4.4	-2.60708	2.61	0.0349	0.284	0.0133716	0.108812	8.13754
4.4	-2.59501	2.58	0.0346	0.283	0.0134109	0.10969	8.17919
4.4	-2.58289	2.57	0.0346	0.284	0.013463	0.110506	8.20809
4.4	-2.57081	2.56	0.0345	0.285	0.0134766	0.111328	8.26087
4.4	-2.55869	2.54	0.034	0.284	0.0133858	0.111811	8.35294
4.4	-2.54662	2.52	0.0338	0.285	0.0134127	0.113095	8.43195
4.4	-2.5345	2.51	0.0337	0.285	0.0134263	0.113546	8.45697
4.4	-2.52242	2.51	0.0335	0.284	0.0133466	0.113147	8.47761
4.4	-2.5103	2.48	0.0333	0.286	0.0134274	0.115323	8.58859
4.4	-2.49823	2.45	0.033	0.285	0.0134694	0.116327	8.63636
4.4	-2.48611	2.43	0.0327	0.286	0.0134568	0.117695	8.74618
4.4	-2.47403	2.41	0.0324	0.287	0.013444	0.119087	8.85802
4.4	-2.46191	2.39	0.0321	0.286	0.013431	0.119665	8.90966
4.4	-2.44979	2.37	0.0319	0.286	0.0134599	0.120675	8.96552
4.4	-2.43772	2.36	0.0318	0.286	0.0134746	0.121186	8.99371
4.4	-2.4256	2.35	0.0316	0.287	0.0134468	0.122128	9.08228
4.4	-2.41352	2.32	0.0312	0.286	0.0134483	0.123276	9.16667
4.4	-2.40141	2.29	0.0308	0.287	0.0134498	0.125328	9.31818
4.4	-2.38929	2.26	0.0304	0.288	0.0134513	0.127434	9.47368
4.4	-2.37721	2.24	0.0302	0.287	0.0134821	0.128125	9.50331
4.4	-2.36509	2.22	0.0299	0.288	0.0134685	0.12973	9.63211
4.4	-2.35302	2.19	0.0295	0.288	0.0134703	0.131507	9.76271
4.4	-2.34094	2.18	0.0294	0.288	0.0134862	0.13211	9.79592
4.4	-2.32882	2.15	0.0291	0.29	0.0135349	0.134884	9.96564
4.4	-2.31675	2.12	0.0286	0.29	0.0134906	0.136792	10.1399
4.4	-2.30463	2.1	0.0282	0.289	0.0134286	0.137619	10.2482
4.4	-2.29255	2.09	0.0281	0.29	0.013445	0.138756	10.3203
4.4	-2.28043	2.05	0.0276	0.289	0.0134634	0.140976	10.471
4.4	-2.26836	2.05	0.0275	0.29	0.0134146	0.141463	10.5455
4.4	-2.25624	2.02	0.0273	0.29	0.0135149	0.143564	10.6227
4.4	-2.24412	1.97	0.0267	0.291	0.0135533	0.147716	10.8989
4.4	-2.23204	1.95	0.0266	0.291	0.013641	0.149231	10.9398
4.4	-2.21992	1.95	0.0262	0.291	0.0134359	0.149231	11.1069
4.4	-2.20785	1.93	0.0262	0.291	0.0135751	0.150777	11.1069
4.4	-2.19573	1.89	0.0257	0.292	0.0135979	0.154497	11.3619
4.4	-2.18361	1.88	0.0253	0.292	0.0134574	0.155319	11.5415
4.4	-2.17153	1.85	0.0251	0.292	0.0135676	0.157838	11.6335
4.4	-2.15946	1.81	0.0244	0.293	0.0134807	0.161878	12.0082
4.4	-2.14734	1.78	0.0241	0.292	0.0135393	0.164045	12.1162
4.4	-2.13522	1.78	0.0242	0.293	0.0135955	0.164607	12.1074
4.4	-2.12315	1.76	0.024	0.293	0.0136364	0.166477	12.2083
4.4	-2.11103	1.74	0.0233	0.294	0.0133908	0.168966	12.618
4.4	-2.09895	1.72	0.0235	0.293	0.0136628	0.170349	12.4681
4.4	-2.08683	1.71	0.0233	0.293	0.0136257	0.171345	12.5751
4.4	-2.07476	1.68	0.0229	0.293	0.013631	0.174405	12.7948
4.4	-2.06264	1.67	0.0228	0.294	0.0136527	0.176048	12.8947
4.4	-2.05056	1.67	0.0227	0.293	0.0135928	0.175449	12.9075
4.4	-2.03844	1.65	0.0225	0.294	0.0136364	0.178182	13.0667
4.4	-2.02637	1.63	0.0222	0.293	0.0136196	0.179755	13.1982
4.4	-2.01425	1.59	0.0217	0.293	0.0136478	0.184277	13.5023
4.4	-2.00217	1.57	0.0215	0.294	0.0136943	0.187261	13.6744
4.4	-1.99005	1.54	0.0211	0.294	0.0137013	0.190909	13.9336
4.4	-1.97798	1.52	0.0208	0.294	0.0136842	0.193421	14.1346
4.4	-1.96586	1.52	0.0207	0.294	0.0136184	0.193421	14.2029
4.4	-1.95374	1.52	0.0207	0.294	0.0136184	0.193421	14.2029
4.4	-1.94166	1.49	0.0203	0.295	0.0136242	0.197987	14.532
4.4	-1.92954	1.47	0.02	0.294	0.0136054	0.2	14.7
4.4	-1.91747	1.46	0.02	0.295	0.0136986	0.202055	14.75
4.4	-1.90535	1.45	0.02	0.295	0.0137931	0.203448	14.75
4.4	-1.89327	1.42	0.0196	0.295	0.0138028	0.207746	15.051
4.4	-1.88115	1.4	0.0192	0.295	0.0137143	0.210714	15.3646
4.4	-1.86908	1.39	0.019	0.294	0.0136691	0.211511	15.4737
4.4	-1.85696	1.36	0.0187	0.294	0.01375	0.216176	15.7219
4.4	-1.84484	1.34	0.0182	0.294	0.0135821	0.219403	16.1538
4.4	-1.83277	1.33	0.0183	0.295	0.0137594	0.221805	16.1202
4.4	-1.82069	1.32	0.0182	0.294	0.0137879	0.222727	16.1538
4.4	-1.80857	1.3	0.0179	0.294	0.0137692	0.226154	16.4246
4.4	-1.79645	1.29	0.0178	0.294	0.0137984	0.227907	16.5169
4.4	-1.78438	1.29	0.0178	0.294	0.0137984	0.227907	16.5169
4.4	-1.77226	1.27	0.0176	0.294	0.0138583	0.231496	16.7045
4.4	-1.76018	1.25	0.017	0.293	0.0136	0.2344	17.2353
4.4	-1.74806	1.24	0.017	0.294	0.0137097	0.237097	17.2941
4.4	-1.73599	1.22	0.0169	0.294	0.0138525	0.240984	17.3964
4.4	-1.72387	1.22	0.0169	0.294	0.0138525	0.240984	17.3964
4.4	-1.71175	1.2	0.0165	0.293	0.01375	0.244167	17.7576
4.4	-1.69967	1.19	0.0164	0.294	0.0137815	0.247059	17.9268
4.4	-1.68755	1.18	0.0163	0.294	0.0138136	0.249153	18.0368
4.4	-1.67548	1.17	0.0161	0.294	0.0137607	0.251282	18.2609
4.4	-1.6634	1.15	0.0158	0.293	0.0137391	0.254783	18.5443
4.4	-1.65128	1.14	0.0159	0.293	0.0139474	0.257018	18.4277
4.4	-1.63916	1.13	0.0155	0.294	0.0137168	0.260177	18.9677
4.4	-1.62709	1.12	0.0154	0.293	0.01375	0.261607	19.026
4.4	-1.61497	1.09	0.0152	0.293	0.013945	0.268807	19.2763
4.4	-1.60289	1.09	0.0151	0.292	0.0138532	0.26789	19.3377
4.4	-1.59077	1.09	0.0151	0.293	0.0138532	0.268807	19.404
4.4	-1.57866	1.08	0.015	0.293	0.0138889	0.271296	19.5333
4.4	-1.56658	1.06	0.0147	0.292	0.0138679	0.275472	19.8639
4.4	-1.5545	1.05	0.0144	0.292	0.0137143	0.278095	20.2778
4.4	-1.54243	1.03	0.0142	0.292	0.0137864	0.283495	20.5634
4.4	-1.53027	1.01	0.0141	0.291	0.0139604	0.288119	20.6383
4.4	-1.51819	1	0.0139	0.291	0.0139	0.291	20.9353
4.4	-1.50612	0.988	0.0136	0.291	0.0137652	0.294534	21.3971
4.4	-1.494	0.977	0.0137	0.291	0.0140225	0.297851	21.2409
4.4	-1.48192	0.967	0.0134	0.291	0.0138573	0.300931	21.7164
4.4	-1.4698	0.968	0.0133	0.29	0.0137397	0.299587	21.8045
4.4	-1.45773	0.958	0.0133	0.291	0.0138831	0.303758	21.8797
4.4	-1.44556	0.935	0.0132	0.29	0.0141176	0.31016	21.9697
4.4	-1.43349	0.928	0.013	0.29	0.0140086	0.3125	22.3077
4.4	-1.42141	0.921	0.0127	0.29	0.0137894	0.314875	22.8346
4.4	-1.40929	0.906	0.0125	0.289	0.0137969	0.318985	23.12
4.4	-1.39722	0.897	0.0125	0.29	0.0139353	0.3233	23.2
4.4	-1.3851	0.893	0.0125	0.29	0.0139978	0.324748	23.2
4.4	-1.37302	0.88	0.0123	0.29	0.0139773	0.329545	23.5772
4.4	-1.3609	0.867	0.0121	0.289	0.0139562	0.333333	23.8843
4.4	-1.34883	0.864	0.0119	0.289	0.0137731	0.334491	24.2857
4.4	-1.33671	0.866	0.012	0.289	0.0138568	0.333718	24.0833
4.4	-1.32463	0.852	0.012	0.289	0.0140845	0.339202	24.0833
4.4	-1.31251	0.838	0.0118	0.287	0.0140811	0.342482	24.322
4.4	-1.3004	0.832	0.0118	0.288	0.0141827	0.346154	24.4068
4.4	-1.28832	0.826	0.0116	0.288	0.0140436	0.348668	24.8276
4.4	-1.27624	0.822	0.0114	0.288	0.0138686	0.350365	25.2632
4.4	-1.26413	0.805	0.0114	0.287	0.0141615	0.356522	25.1754
4.4	-1.25201	0.801	0.0112	0.287	0.0139825	0.358302	25.625
4.4	-1.23993	0.796	0.0112	0.286	0.0140704	0.359296	25.5357
4.4	-1.22781	0.784	0.011	0.287	0.0140306	0.366071	26.0909
4.4	-1.21574	0.779	0.0108	0.288	0.0138639	0.369705	26.6667
4.4	-1.20362	0.768	0.0109	0.286	0.0141927	0.372396	26.2385
4.4	-1.1915	0.759	0.0108	0.286	0.0142292	0.376812	26.4815
4.4	-1.17942	0.755	0.0107	0.286	0.0141722	0.378808	26.729
4.4	-1.1673	0.753	0.0106	0.286	0.014077	0.379814	26.9811
4.4	-1.15523	0.745	0.0106	0.286	0.0142282	0.383893	26.9811
4.4	-1.14315	0.737	0.0104	0.285	0.0141113	0.386703	27.4038
4.4	-1.13103	0.729	0.0102	0.285	0.0139918	0.390947	27.9412
4.4	-1.11891	0.724	0.0102	0.285	0.0140884	0.393646	27.9412
4.4	-1.10684	0.72	0.0101	0.285	0.0140278	0.395833	28.2178
4.4	-1.09472	0.712	0.00995	0.285	0.0139747	0.400281	28.6432
4.4	-1.08264	0.707	0.00996	0.284	0.0140877	0.401697	28.5141
4.4	-1.07052	0.709	0.0102	0.285	0.0143865	0.401975	27.9412
4.4	-1.05845	0.705	0.00996	0.284	0.0141277	0.402837	28.5141
4.4	-1.04633	0.698	0.00971	0.284	0.0139112	0.406877	29.2482
4.4	-1.03425	0.691	0.00972	0.283	0.0140666	0.409551	29.1152
4.4	-1.02213	0.685	0.00977	0.283	0.0142628	0.413139	28.9662
4.4	-1.01002	0.679	0.00948	0.283	0.0139617	0.416789	29.8523
4.4	-0.99794	0.67	0.00955	0.283	0.0142537	0.422388	29.6335
4.4	-0.985865	0.668	0.00937	0.282	0.0140269	0.422156	30.0961
4.4	-0.973746	0.667	0.00943	0.283	0.0141379	0.424288	30.0106
4.4	-0.961626	0.662	0.00932	0.283	0.0140785	0.427492	30.3648
4.4	-0.949551	0.654	0.00905	0.282	0.0138379	0.431193	31.1602
4.4	-0.937432	0.649	0.00926	0.282	0.0142681	0.434515	30.4536
4.4	-0.925356	0.644	0.00919	0.282	0.0142702	0.437888	30.6855
4.4	-0.913237	0.639	0.00896	0.282	0.0140219	0.441315	31.4732
4.4	-0.901162	0.634	0.00905	0.282	0.0142744	0.444795	31.1602
4.4	-0.889042	0.628	0.00881	0.282	0.0140287	0.449045	32.0091
4.4	-0.876967	0.624	0.00886	0.281	0.0141987	0.450321	31.7156
4.4	-0.864848	0.622	0.0089	0.281	0.0143087	0.451768	31.573
4.4	-0.852772	0.62	0.00888	0.281	0.0143226	0.453226	31.6441
4.4	-0.840653	0.617	0.0087	0.281	0.0141005	0.455429	32.2989
4.4	-0.828534	0.609	0.0086	0.281	0.0141215	0.461412	32.6744
4.4	-0.816458	0.605	0.00841	0.28	0.0139008	0.46281	33.2937
4.4	-0.804339	0.6	0.00865	0.281	0.0144167	0.468333	32.4855
4.4	-0.792264	0.591	0.00834	0.28	0.0141117	0.473773	33.5731
4.4	-0.780144	0.593	0.00836	0.28	0.0140978	0.472175	33.4928
4.4	-0.768025	0.593	0.00844	0.28	0.0142327	0.472175	33.1754
4.4	-0.75595	0.594	0.00849	0.28	0.0142929	0.47138	32.98
4.4	-0.743875	0.589	0.00843	0.281	0.0143124	0.47708	33.3333
4.4	-0.731755	0.582	0.00827	0.28	0.0142096	0.4811	33.8573
4.4	-0.71968	0.577	0.00809	0.28	0.0140208	0.485269	34.6106
4.4	-0.707561	0.571	0.00807	0.28	0.0141331	0.490368	34.6964
4.4	-0.695441	0.565	0.00796	0.279	0.0140885	0.493805	35.0503
4.4	-0.683366	0.566	0.00795	0.279	0.0140459	0.492933	35.0943
4.4	-0.671247	0.563	0.00792	0.279	0.0140675	0.49556	35.2273
4.4	-0.659171	0.558	0.00793	0.279	0.0142115	0.5	35.1828
4.4	-0.647052	0.552	0.00778	0.279	0.0140942	0.505435	35.8612
4.4	-0.634977	0.55	0.00776	0.279	0.0141091	0.507273	35.9536
4.4	-0.622857	0.549	0.00794	0.279	0.0144627	0.508197	35.1385
4.4	-0.610738	0.547	0.00779	0.279	0.0142413	0.510055	35.8151
4.4	-0.598663	0.54	0.00765	0.279	0.0141667	0.516667	36.4706
4.4	-0.586543	0.537	0.00775	0.279	0.014432	0.519553	36
4.4	-0.574468	0.53	0.00752	0.279	0.0141887	0.526415	37.1011
4.4	-0.562349	0.526	0.00744	0.278	0.0141445	0.528517	37.3656
4.4	-0.550273	0.528	0.0077	0.279	0.0145833	0.528409	36.2338
4.4	-0.538154	0.524	0.00746	0.279	0.0142366	0.532443	37.3995
4.4	-0.526079	0.519	0.00732	0.278	0.014104	0.535645	37.9781
4.4	-0.513959	0.514	0.00721	0.279	0.0140272	0.542802	38.6963
4.4	-0.501884	0.512	0.00727	0.279	0.0141992	0.544922	38.3769
4.4	-0.489765	0.512	0.00721	0.279	0.014082	0.544922	38.6963
4.4	-0.477689	0.506	0.00714	0.278	0.0141107	0.549407	38.9356
4.4	-0.46557	0.504	0.00727	0.278	0.0144246	0.551587	38.2393
4.4	-0.453495	0.504	0.00726	0.279	0.0144048	0.553571	38.4298
4.4	-0.441375	0.498	0.0071	0.278	0.014257	0.558233	39.1549
4.4	-0.4293	0.495	0.00694	0.278	0.0140202	0.561616	40.0576
4.4	-0.417181	0.492	0.00697	0.278	0.0141667	0.565041	39.8852
4.4	-0.405106	0.489	0.00714	0.278	0.0146012	0.568507	38.9356
4.4	-0.392986	0.49	0.00689	0.278	0.0140612	0.567347	40.3483
4.4	-0.380867	0.49	0.007	0.278	0.0142857	0.567347	39.7143
4.4	-0.368792	0.491	0.00692	0.279	0.0140937	0.568228	40.3179
4.4	-0.356672	0.492	0.00705	0.278	0.0143293	0.565041	39.4326
4.4	-0.344597	0.492	0.00701	0.278	0.014248	0.565041	39.6576
4.4	-0.332478	0.493	0.00703	0.278	0.0142596	0.563895	39.5448
4.4	-0.320402	0.49	0.00696	0.278	0.0142041	0.567347	39.9425
4.4	-0.308283	0.489	0.00707	0.278	0.0144581	0.568507	39.3211
4.4	-0.296208	0.49	0.007	0.278	0.0142857	0.567347	39.7143
4.4	-0.284088	0.489	0.0069	0.278	0.0141104	0.568507	40.2899
4.4	-0.271969	0.489	0.00693	0.28	0.0141718	0.572597	40.404
4.4	-0.259894	0.49	0.00711	0.279	0.0145102	0.569388	39.2405
4.4	-0.247774	0.49	0.00705	0.278	0.0143878	0.567347	39.4326
4.4	-0.235699	0.491	0.00711	0.279	0.0144807	0.568228	39.2405
4.4	-0.22358	0.49	0.00695	0.279	0.0141837	0.569388	40.1439
4.4	-0.211504	0.49	0.00691	0.279	0.014102	0.569388	40.3763
4.4	-0.199385	0.49	0.00693	0.279	0.0141429	0.569388	40.2597
4.4	-0.18731	0.492	0.00701	0.279	0.014248	0.567073	39.8003
4.4	-0.17519	0.491	0.00712	0.279	0.014501	0.568228	39.1854
4.4	-0.163115	0.492	0.00686	0.279	0.0139431	0.567073	40.6706
4.4	-0.150996	0.492	0.00706	0.278	0.0143496	0.565041	39.3768
4.4	-0.138921	0.489	0.0071	0.279	0.0145194	0.570552	39.2958
4.4	-0.126801	0.489	0.00698	0.279	0.014274	0.570552	39.9713
4.4	-0.114726	0.49	0.00695	0.279	0.0141837	0.569388	40.1439
4.4	-0.102607	0.491	0.00701	0.279	0.014277	0.568228	39.8003
4.4	-0.0904872	0.49	0.00688	0.279	0.0140408	0.569388	40.5523
4.4	-0.0784119	0.49	0.00696	0.279	0.0142041	0.569388	40.0862
4.4	-0.0662925	0.49	0.00711	0.278	0.0145102	0.567347	39.0999
4.4	-0.0542172	0.492	0.00708	0.279	0.0143902	0.567073	39.4068
4.4	-0.042142	0.491	0.00711	0.279	0.0144807	0.568228	39.2405
4.4	-0.0300226	0.49	0.00694	0.279	0.0141633	0.569388	40.2017
4.4	-0.0179033	0.491	0.00707	0.279	0.0143992	0.568228	39.4625
4.4	-0.00582798	0.491	0.00702	0.279	0.0142974	0.568228	39.7436
4.4	0.00629138	0.491	0.00722	0.279	0.0147047	0.568228	38.6427
4.4	0.0183667	0.493	0.00709	0.279	0.0143813	0.565923	39.3512
4.4	0.030486	0.491	0.00701	0.279	0.014277	0.568228	39.8003
4.4	0.0426054	0.493	0.00713	0.28	0.0144625	0.567951	39.2707
4.4	0.0546806	0.492	0.00714	0.279	0.0145122	0.567073	39.0756
4.4	0.0668	0.491	0.00692	0.278	0.0140937	0.566191	40.1734
4.2	-4.9575	0.684	0.00941	0.292	0.0137573	0.426901	31.0308
4.2	-4.94493	0.685	0.00974	0.292	0.014219	0.426277	29.9795
4.2	-4.93236	0.686	0.00971	0.292	0.0141545	0.425656	30.0721
4.2	-4.91975	0.684	0.00962	0.292	0.0140643	0.426901	30.3534
4.2	-4.90718	0.687	0.00961	0.292	0.0139884	0.425036	30.385
4.2	-4.89457	0.685	0.00967	0.292	0.0141168	0.426277	30.1965
4.2	-4.88196	0.685	0.00971	0.292	0.0141752	0.426277	30.0721
4.2	-4.86939	0.685	0.00966	0.292	0.0141022	0.426277	30.2277
4.2	-4.85677	0.685	0.00958	0.291	0.0139854	0.424818	30.3758
4.2	-4.84421	0.684	0.00953	0.292	0.0139327	0.426901	30.6401
4.2	-4.83159	0.685	0.00967	0.292	0.0141168	0.426277	30.1965
4.2	-4.81903	0.688	0.00971	0.293	0.0141134	0.425872	30.1751
4.2	-4.80641	0.687	0.00969	0.292	0.0141048	0.425036	30.1342
4.2	-4.7938	0.686	0.00974	0.292	0.0141983	0.425656	29.9795
4.2	-4.78123	0.686	0.00961	0.292	0.0140087	0.425656	30.385
4.2	-4.76866	0.687	0.00959	0.292	0.0139592	0.425036	30.4484
4.2	-4.75605	0.684	0.00962	0.292	0.0140643	0.426901	30.3534
4.2	-4.74344	0.683	0.00957	0.292	0.0140117	0.427526	30.512
4.2	-4.73087	0.688	0.00964	0.292	0.0140116	0.424419	30.2905
4.2	-4.71825	0.696	0.00962	0.292	0.0138218	0.41954	30.3534
4.2	-4.70569	0.701	0.00981	0.292	0.0139943	0.416548	29.7655
4.2	-4.69307	0.709	0.0101	0.292	0.0142454	0.411848	28.9109
4.2	-4.68051	0.715	0.0101	0.291	0.0141259	0.406993	28.8119
4.2	-4.66789	0.726	0.0102	0.291	0.0140496	0.400826	28.5294
4.2	-4.65532	0.738	0.0104	0.29	0.0140921	0.392954	27.8846
4.2	-4.64271	0.749	0.0106	0.291	0.0141522	0.388518	27.4528
4.2	-4.6301	0.755	0.0107	0.29	0.0141722	0.384106	27.1028
4.2	-4.61757	0.76	0.0107	0.29	0.0140789	0.381579	27.1028
4.2	-4.60496	0.769	0.0108	0.29	0.0140442	0.377113	26.8519
4.2	-4.59235	0.783	0.0109	0.291	0.0139208	0.371648	26.6972
4.2	-4.57978	0.793	0.0111	0.29	0.0139975	0.3657	26.1261
4.2	-4.56717	0.806	0.0113	0.29	0.0140199	0.359801	25.6637
4.2	-4.5546	0.819	0.0114	0.289	0.0139194	0.352869	25.3509
4.2	-4.54198	0.833	0.0118	0.29	0.0141657	0.348139	24.5763
4.2	-4.52937	0.836	0.0117	0.291	0.0139952	0.348086	24.8718
4.2	-4.5168	0.838	0.0117	0.289	0.0139618	0.344869	24.7009
4.2	-4.50419	0.849	0.0119	0.289	0.0140165	0.3404	24.2857
4.2	-4.49162	0.862	0.012	0.29	0.0139211	0.336427	24.1667
4.2	-4.47901	0.864	0.012	0.29	0.0138889	0.335648	24.1667
4.2	-4.46644	0.874	0.0123	0.289	0.0140732	0.330664	23.4959
4.2	-4.45383	0.881	0.0122	0.289	0.0138479	0.328036	23.6885
4.2	-4.44121	0.883	0.0123	0.289	0.0139298	0.327293	23.4959
4.2	-4.42865	0.892	0.0126	0.288	0.0141256	0.32287	22.8571
4.2	-4.41608	0.906	0.0126	0.288	0.0139073	0.317881	22.8571
4.2	-4.40346	0.911	0.0127	0.288	0.0139407	0.316136	22.6772
4.2	-4.39085	0.911	0.0129	0.288	0.0141603	0.316136	22.3256
4.2	-4.37828	0.922	0.0129	0.288	0.0139913	0.312364	22.3256
4.2	-4.36572	0.93	0.0129	0.288	0.013871	0.309677	22.3256
4.2	-4.3531	0.932	0.0129	0.288	0.0138412	0.309013	22.3256
4.2	-4.34049	0.942	0.013	0.289	0.0138004	0.306794	22.2308
4.2	-4.32792	0.953	0.0133	0.287	0.0139559	0.301154	21.5789
4.2	-4.31531	0.962	0.0133	0.287	0.0138254	0.298337	21.5789
4.2	-4.30274	0.97	0.0135	0.288	0.0139175	0.296907	21.3333
4.2	-4.29013	0.975	0.0136	0.288	0.0139487	0.295385	21.1765
4.2	-4.27756	0.984	0.0137	0.287	0.0139228	0.291667	20.9489
4.2	-4.26494	0.996	0.0139	0.287	0.0139558	0.288153	20.6475
4.2	-4.25233	1	0.014	0.287	0.014	0.287	20.5
4.2	-4.23976	1.01	0.014	0.287	0.0138614	0.284158	20.5
4.2	-4.22715	1.02	0.0142	0.286	0.0139216	0.280392	20.1408
4.2	-4.21458	1.03	0.0144	0.287	0.0139806	0.278641	19.9306
4.2	-4.20197	1.04	0.0145	0.288	0.0139423	0.276923	19.8621
4.2	-4.1894	1.04	0.0145	0.286	0.0139423	0.275	19.7241
4.2	-4.17679	1.06	0.0147	0.287	0.0138679	0.270755	19.5238
4.2	-4.16422	1.07	0.0147	0.287	0.0137383	0.268224	19.5238
4.2	-4.1516	1.07	0.015	0.286	0.0140187	0.26729	19.0667
4.2	-4.13904	1.09	0.015	0.286	0.0137615	0.262385	19.0667
4.2	-4.12642	1.11	0.0154	0.286	0.0138739	0.257658	18.5714
4.2	-4.11381	1.12	0.0155	0.286	0.0138393	0.255357	18.4516
4.2	-4.10124	1.13	0.0156	0.285	0.0138053	0.252212	18.2692
4.2	-4.08863	1.15	0.016	0.286	0.013913	0.248696	17.875
4.2	-4.07606	1.17	0.016	0.286	0.0136752	0.244444	17.875
4.2	-4.06345	1.17	0.0161	0.285	0.0137607	0.24359	17.7019
4.2	-4.05088	1.19	0.0163	0.285	0.0136975	0.239496	17.4847
4.2	-4.03827	1.19	0.0163	0.285	0.0136975	0.239496	17.4847
4.2	-4.0257	1.19	0.0164	0.285	0.0137815	0.239496	17.378
4.2	-4.01308	1.19	0.0164	0.285	0.0137815	0.239496	17.378
4.2	-4.00052	1.21	0.0167	0.286	0.0138017	0.236364	17.1257
4.2	-3.98795	1.23	0.0168	0.286	0.0136585	0.23252	17.0238
4.2	-3.97534	1.25	0.0171	0.285	0.01368	0.228	16.6667
4.2	-3.96272	1.27	0.0175	0.285	0.0137795	0.224409	16.2857
4.2	-3.95015	1.29	0.0178	0.284	0.0137984	0.220155	15.9551
4.2	-3.93754	1.3	0.018	0.285	0.0138462	0.219231	15.8333
4.2	-3.92493	1.3	0.0179	0.284	0.0137692	0.218462	15.8659
4.2	-3.91236	1.32	0.0182	0.284	0.0137879	0.215152	15.6044
4.2	-3.89975	1.35	0.0186	0.284	0.0137778	0.21037	15.2688
4.2	-3.88718	1.37	0.0188	0.284	0.0137226	0.207299	15.1064
4.2	-3.87461	1.4	0.0191	0.283	0.0136429	0.202143	14.8168
4.2	-3.862	1.43	0.0194	0.284	0.0135664	0.198601	14.6392
4.2	-3.84938	1.45	0.0196	0.284	0.0135172	0.195862	14.4898
4.2	-3.83681	1.44	0.0196	0.283	0.0136111	0.196528	14.4388
4.2	-3.8242	1.45	0.0199	0.283	0.0137241	0.195172	14.2211
4.2	-3.81163	1.49	0.0201	0.283	0.0134899	0.189933	14.0796
4.2	-3.79907	1.5	0.0206	0.284	0.0137333	0.189333	13.7864
4.2	-3.78645	1.53	0.0209	0.283	0.0136601	0.184967	13.5407
4.2	-3.77384	1.56	0.0211	0.283	0.0135256	0.18141	13.4123
4.2	-3.76127	1.59	0.0216	0.283	0.0135849	0.177987	13.1019
4.2	-3.74866	1.6	0.022	0.282	0.01375	0.17625	12.8182
4.2	-3.73609	1.64	0.0221	0.283	0.0134756	0.172561	12.8054
4.2	-3.72348	1.67	0.0225	0.283	0.0134731	0.169461	12.5778
4.2	-3.71086	1.67	0.0228	0.283	0.0136527	0.169461	12.4123
4.2	-3.69829	1.68	0.0229	0.282	0.013631	0.167857	12.3144
4.2	-3.68568	1.71	0.0232	0.282	0.0135673	0.164912	12.1552
4.2	-3.67311	1.74	0.0236	0.282	0.0135632	0.162069	11.9492
4.2	-3.6605	1.75	0.0237	0.282	0.0135429	0.161143	11.8987
4.2	-3.64793	1.77	0.0239	0.282	0.0135028	0.159322	11.7992
4.2	-3.63532	1.8	0.0246	0.282	0.0136667	0.156667	11.4634
4.2	-3.62275	1.84	0.0249	0.282	0.0135326	0.153261	11.3253
4.2	-3.61014	1.86	0.0252	0.282	0.0135484	0.151613	11.1905
4.2	-3.59752	1.88	0.0254	0.281	0.0135106	0.149468	11.063
4.2	-3.585	1.91	0.0256	0.281	0.0134031	0.14712	10.9766
4.2	-3.57234	1.91	0.0258	0.281	0.0135079	0.14712	10.8915
4.2	-3.55977	1.92	0.0259	0.282	0.0134896	0.146875	10.888
4.2	-3.54721	1.96	0.0266	0.282	0.0135714	0.143878	10.6015
4.2	-3.53459	1.98	0.0268	0.281	0.0135354	0.141919	10.4851
4.2	-3.52203	2	0.0271	0.282	0.01355	0.141	10.4059
4.2	-3.50941	2.02	0.0272	0.281	0.0134653	0.139109	10.3309
4.2	-3.49684	2.05	0.0277	0.282	0.0135122	0.137561	10.1805
4.2	-3.48423	2.09	0.028	0.281	0.0133971	0.13445	10.0357
4.2	-3.47162	2.11	0.0284	0.281	0.0134597	0.133175	9.89437
4.2	-3.45905	2.13	0.0286	0.281	0.0134272	0.131925	9.82517
4.2	-3.44648	2.16	0.0292	0.282	0.0135185	0.130556	9.65753
4.2	-3.43387	2.18	0.0293	0.282	0.0134404	0.129358	9.62457
4.2	-3.42125	2.2	0.0296	0.281	0.0134545	0.127727	9.49324
4.2	-3.40864	2.23	0.03	0.281	0.0134529	0.126009	9.36667
4.2	-3.39607	2.26	0.0304	0.281	0.0134513	0.124336	9.24342
4.2	-3.3835	2.28	0.0306	0.28	0.0134211	0.122807	9.15033
4.2	-3.37089	2.31	0.0309	0.281	0.0133766	0.121645	9.09385
4.2	-3.35828	2.35	0.0316	0.281	0.0134468	0.119574	8.89241
4.2	-3.34571	2.35	0.0316	0.281	0.0134468	0.119574	8.89241
4.2	-3.3331	2.36	0.0315	0.281	0.0133475	0.119068	8.92063
4.2	-3.32053	2.38	0.032	0.281	0.0134454	0.118067	8.78125
4.2	-3.30791	2.4	0.0322	0.281	0.0134167	0.117083	8.72671
4.2	-3.29535	2.43	0.0326	0.28	0.0134156	0.115226	8.58896
4.2	-3.28273	2.45	0.033	0.281	0.0134694	0.114694	8.51515
4.2	-3.27017	2.49	0.0334	0.281	0.0134137	0.112851	8.41317
4.2	-3.25755	2.52	0.0338	0.281	0.0134127	0.111508	8.31361
4.2	-3.24494	2.56	0.0343	0.281	0.0133984	0.109766	8.19242
4.2	-3.23237	2.56	0.0343	0.281	0.0133984	0.109766	8.19242
4.2	-3.2198	2.59	0.0348	0.28	0.0134363	0.108108	8.04598
4.2	-3.20724	2.62	0.035	0.281	0.0133588	0.107252	8.02857
4.2	-3.19458	2.62	0.035	0.281	0.0133588	0.107252	8.02857
4.2	-3.18201	2.65	0.0355	0.281	0.0133962	0.106038	7.91549
4.2	-3.16944	2.67	0.0358	0.281	0.0134082	0.105243	7.84916
4.2	-3.15683	2.7	0.0364	0.28	0.0134815	0.103704	7.69231
4.2	-3.14421	2.74	0.0367	0.281	0.0133942	0.102555	7.65668
4.2	-3.13165	2.76	0.0371	0.28	0.013442	0.101449	7.54717
4.2	-3.11903	2.79	0.0372	0.281	0.0133333	0.100717	7.55376
4.2	-3.10646	2.79	0.0373	0.28	0.0133692	0.100358	7.5067
4.2	-3.0939	2.8	0.0373	0.28	0.0133214	0.1	7.5067
4.2	-3.08128	2.82	0.0377	0.281	0.0133688	0.0996454	7.45358
4.2	-3.06867	2.84	0.038	0.281	0.0133803	0.0989437	7.39474
4.2	-3.05606	2.86	0.0382	0.281	0.0133566	0.0982517	7.35602
4.2	-3.04349	2.88	0.0385	0.281	0.0133681	0.0975694	7.2987
4.2	-3.03087	2.91	0.0389	0.281	0.0133677	0.0965636	7.22365
4.2	-3.01831	2.92	0.039	0.282	0.0133562	0.0965753	7.23077
4.2	-3.00574	2.95	0.0393	0.282	0.013322	0.0955932	7.17557
4.2	-2.99308	2.96	0.0396	0.281	0.0133784	0.0949324	7.09596
4.2	-2.98051	2.96	0.0395	0.282	0.0133446	0.0952703	7.13924
4.2	-2.96794	2.97	0.0398	0.281	0.0134007	0.0946128	7.0603
4.2	-2.95533	2.99	0.0399	0.281	0.0133445	0.0939799	7.04261
4.2	-2.94276	2.99	0.04	0.28	0.0133779	0.0936455	7
4.2	-2.93015	3	0.0401	0.282	0.0133667	0.094	7.03242
4.2	-2.91758	3	0.0399	0.281	0.0133	0.0936667	7.04261
4.2	-2.90497	3.02	0.0401	0.281	0.0132781	0.0930464	7.00748
4.2	-2.8924	3.02	0.0404	0.281	0.0133775	0.0930464	6.95545
4.2	-2.87979	3.02	0.0404	0.281	0.0133775	0.0930464	6.95545
4.2	-2.86717	3.02	0.0404	0.281	0.0133775	0.0930464	6.95545
4.2	-2.8546	3.02	0.0403	0.281	0.0133444	0.0930464	6.9727
4.2	-2.84199	3.02	0.0405	0.282	0.0134106	0.0933775	6.96296
4.2	-2.82942	3.03	0.0405	0.282	0.0133663	0.0930693	6.96296
4.2	-2.81681	3.02	0.0403	0.282	0.0133444	0.0933775	6.99752
4.2	-2.80424	3.02	0.0404	0.281	0.0133775	0.0930464	6.95545
4.2	-2.79163	3.03	0.0406	0.282	0.0133993	0.0930693	6.94581
4.2	-2.77906	3.01	0.0402	0.282	0.0133555	0.0936877	7.01493
4.2	-2.76645	3	0.0401	0.282	0.0133667	0.094	7.03242
4.2	-2.75388	3	0.04	0.282	0.0133333	0.094	7.05
4.2	-2.74127	3	0.04	0.281	0.0133333	0.0936667	7.025
4.2	-2.72865	3	0.0402	0.282	0.0134	0.094	7.01493
4.2	-2.71608	2.97	0.0396	0.282	0.0133333	0.0949495	7.12121
4.2	-2.70347	2.97	0.0397	0.282	0.013367	0.0949495	7.10327
4.2	-2.6909	2.95	0.0396	0.282	0.0134237	0.0955932	7.12121
4.2	-2.67833	2.94	0.0394	0.283	0.0134014	0.0962585	7.18274
4.2	-2.66572	2.93	0.0391	0.282	0.0133447	0.0962457	7.21228
4.2	-2.65311	2.91	0.0388	0.283	0.0133333	0.0972509	7.29381
4.2	-2.64049	2.89	0.0388	0.282	0.0134256	0.0975779	7.26804
4.2	-2.62793	2.87	0.0384	0.283	0.0133798	0.0986063	7.36979
4.2	-2.61536	2.86	0.0383	0.285	0.0133916	0.0996503	7.44125
4.2	-2.60274	2.87	0.0384	0.284	0.0133798	0.0989547	7.39583
4.2	-2.59013	2.86	0.0383	0.283	0.0133916	0.098951	7.38903
4.2	-2.57756	2.85	0.038	0.284	0.0133333	0.0996491	7.47368
4.2	-2.565	2.84	0.038	0.284	0.0133803	0.1	7.47368
4.2	-2.55238	2.81	0.0377	0.285	0.0134164	0.101423	7.55968
4.2	-2.53981	2.78	0.0372	0.285	0.0133813	0.102518	7.66129
4.2	-2.5272	2.76	0.0369	0.285	0.0133696	0.103261	7.72358
4.2	-2.51459	2.74	0.0367	0.285	0.0133942	0.104015	7.76567
4.2	-2.50202	2.72	0.0365	0.285	0.0134191	0.104779	7.80822
4.2	-2.48941	2.69	0.0361	0.285	0.0134201	0.105948	7.89474
4.2	-2.47684	2.66	0.0357	0.286	0.0134211	0.107519	8.0112
4.2	-2.46427	2.65	0.0354	0.287	0.0133585	0.108302	8.10734
4.2	-2.45166	2.62	0.0352	0.286	0.0134351	0.10916	8.125
4.2	-2.43904	2.6	0.0349	0.287	0.0134231	0.110385	8.2235
4.2	-2.42648	2.59	0.0347	0.287	0.0133977	0.110811	8.27089
4.2	-2.41386	2.57	0.0347	0.287	0.0135019	0.111673	8.27089
4.2	-2.40129	2.55	0.0344	0.287	0.0134902	0.112549	8.34302
4.2	-2.38868	2.53	0.0339	0.287	0.0133992	0.113439	8.46608
4.2	-2.37611	2.51	0.0338	0.287	0.0134661	0.114343	8.49112
4.2	-2.3635	2.5	0.0335	0.287	0.0134	0.1148	8.56716
4.2	-2.35089	2.47	0.0332	0.288	0.0134413	0.116599	8.6747
4.2	-2.33832	2.46	0.0332	0.288	0.0134959	0.117073	8.6747
4.2	-2.3257	2.41	0.0326	0.288	0.013527	0.119502	8.83436
4.2	-2.31314	2.38	0.032	0.289	0.0134454	0.121429	9.03125
4.2	-2.30052	2.34	0.0315	0.289	0.0134615	0.123504	9.1746
4.2	-2.28796	2.31	0.0311	0.289	0.0134632	0.125108	9.2926
4.2	-2.27534	2.3	0.0308	0.289	0.0133913	0.125652	9.38312
4.2	-2.26277	2.27	0.0306	0.289	0.0134802	0.127313	9.44444
4.2	-2.25016	2.23	0.0301	0.29	0.0134978	0.130045	9.63455
4.2	-2.23759	2.21	0.0299	0.29	0.0135294	0.131222	9.699
4.2	-2.22498	2.2	0.0296	0.292	0.0134545	0.132727	9.86486
4.2	-2.21241	2.16	0.0293	0.292	0.0135648	0.135185	9.96587
4.2	-2.1998	2.16	0.0291	0.291	0.0134722	0.134722	10
4.2	-2.18723	2.13	0.0288	0.291	0.0135211	0.13662	10.1042
4.2	-2.17462	2.1	0.0282	0.291	0.0134286	0.138571	10.3191
4.2	-2.16205	2.07	0.0279	0.292	0.0134783	0.141063	10.4659
4.2	-2.14943	2.05	0.0278	0.293	0.013561	0.142927	10.5396
4.2	-2.13682	2.03	0.0274	0.292	0.0134975	0.143842	10.6569
4.2	-2.12425	1.99	0.027	0.293	0.0135678	0.147236	10.8519
4.2	-2.11164	1.96	0.0265	0.293	0.0135204	0.14949	11.0566
4.2	-2.09907	1.95	0.0264	0.293	0.0135385	0.150256	11.0985
4.2	-2.08646	1.91	0.026	0.293	0.0136126	0.153403	11.2692
4.2	-2.07389	1.87	0.0253	0.293	0.0135294	0.156684	11.581
4.2	-2.06128	1.84	0.0251	0.294	0.0136413	0.159783	11.7131
4.2	-2.04871	1.82	0.0247	0.293	0.0135714	0.160989	11.8623
4.2	-2.0361	1.8	0.0244	0.294	0.0135556	0.163333	12.0492
4.2	-2.02353	1.79	0.0243	0.294	0.0135754	0.164246	12.0988
4.2	-2.01091	1.79	0.0243	0.294	0.0135754	0.164246	12.0988
4.2	-1.9983	1.77	0.0242	0.294	0.0136723	0.166102	12.1488
4.2	-1.98573	1.74	0.0239	0.294	0.0137356	0.168966	12.3013
4.2	-1.97317	1.74	0.0236	0.295	0.0135632	0.16954	12.5
4.2	-1.96055	1.73	0.0236	0.294	0.0136416	0.169942	12.4576
4.2	-1.94794	1.68	0.0228	0.294	0.0135714	0.175	12.8947
4.2	-1.93537	1.64	0.0225	0.294	0.0137195	0.179268	13.0667
4.2	-1.92276	1.62	0.022	0.295	0.0135802	0.182099	13.4091
4.2	-1.91019	1.62	0.0221	0.295	0.013642	0.182099	13.3484
4.2	-1.89758	1.58	0.0217	0.295	0.0137342	0.186709	13.5945
4.2	-1.88501	1.58	0.0216	0.295	0.0136709	0.186709	13.6574
4.2	-1.87244	1.58	0.0215	0.295	0.0136076	0.186709	13.7209
4.2	-1.85983	1.55	0.0214	0.295	0.0138065	0.190323	13.785
4.2	-1.84721	1.52	0.021	0.295	0.0138158	0.194079	14.0476
4.2	-1.8346	1.49	0.0203	0.295	0.0136242	0.197987	14.532
4.2	-1.82203	1.49	0.0203	0.295	0.0136242	0.197987	14.532
4.2	-1.80946	1.48	0.0203	0.295	0.0137162	0.199324	14.532
4.2	-1.79685	1.45	0.0198	0.295	0.0136552	0.203448	14.899
4.2	-1.78424	1.43	0.0196	0.295	0.0137063	0.206294	15.051
4.2	-1.77167	1.42	0.0195	0.295	0.0137324	0.207746	15.1282
4.2	-1.75905	1.4	0.0192	0.295	0.0137143	0.210714	15.3646
4.2	-1.74649	1.38	0.0191	0.294	0.0138406	0.213043	15.3927
4.2	-1.73387	1.36	0.0187	0.294	0.01375	0.216176	15.7219
4.2	-1.72131	1.34	0.0185	0.294	0.013806	0.219403	15.8919
4.2	-1.70869	1.32	0.0181	0.294	0.0137121	0.222727	16.2431
4.2	-1.69612	1.31	0.0179	0.294	0.0136641	0.224427	16.4246
4.2	-1.68351	1.32	0.0183	0.295	0.0138636	0.223485	16.1202
4.2	-1.6709	1.31	0.018	0.294	0.0137405	0.224427	16.3333
4.2	-1.65833	1.29	0.0177	0.294	0.0137209	0.227907	16.6102
4.2	-1.64572	1.28	0.0176	0.294	0.01375	0.229687	16.7045
4.2	-1.63315	1.27	0.0175	0.294	0.0137795	0.231496	16.8
4.2	-1.62053	1.25	0.0173	0.294	0.01384	0.2352	16.9942
4.2	-1.60797	1.22	0.0168	0.294	0.0137705	0.240984	17.5
4.2	-1.5954	1.22	0.0168	0.294	0.0137705	0.240984	17.5
4.2	-1.58279	1.2	0.0166	0.293	0.0138333	0.244167	17.6506
4.2	-1.57017	1.18	0.0166	0.293	0.0140678	0.248305	17.6506
4.2	-1.5576	1.17	0.0161	0.293	0.0137607	0.250427	18.1988
4.2	-1.54499	1.16	0.016	0.293	0.0137931	0.252586	18.3125
4.2	-1.53242	1.15	0.016	0.292	0.013913	0.253913	18.25
4.2	-1.51981	1.13	0.0155	0.292	0.0137168	0.258407	18.8387
4.2	-1.5072	1.12	0.0155	0.292	0.0138393	0.260714	18.8387
4.2	-1.49463	1.11	0.0154	0.293	0.0138739	0.263964	19.026
4.2	-1.48201	1.1	0.0152	0.292	0.0138182	0.265455	19.2105
4.2	-1.46945	1.08	0.0151	0.291	0.0139815	0.269444	19.2715
4.2	-1.45683	1.07	0.0149	0.292	0.0139252	0.272897	19.5973
4.2	-1.44426	1.05	0.0145	0.291	0.0138095	0.277143	20.069
4.2	-1.43165	1.03	0.0144	0.29	0.0139806	0.281553	20.1389
4.2	-1.41904	1.02	0.0143	0.291	0.0140196	0.285294	20.3497
4.2	-1.40647	1.02	0.014	0.291	0.0137255	0.285294	20.7857
4.2	-1.3939	1.01	0.0141	0.291	0.0139604	0.288119	20.6383
4.2	-1.38129	0.994	0.0139	0.29	0.0139839	0.291751	20.8633
4.2	-1.36872	0.986	0.0137	0.29	0.0138945	0.294118	21.1679
4.2	-1.35611	0.975	0.0135	0.29	0.0138462	0.297436	21.4815
4.2	-1.34354	0.96	0.0134	0.29	0.0139583	0.302083	21.6418
4.2	-1.33093	0.948	0.0133	0.29	0.0140295	0.305907	21.8045
4.2	-1.31831	0.949	0.0133	0.29	0.0140148	0.305585	21.8045
4.2	-1.30579	0.943	0.0131	0.289	0.0138918	0.306469	22.0611
4.2	-1.29313	0.925	0.0129	0.288	0.0139459	0.311351	22.3256
4.2	-1.28056	0.91	0.0127	0.289	0.013956	0.317582	22.7559
4.2	-1.268	0.903	0.0125	0.288	0.0138427	0.318937	23.04
4.2	-1.25538	0.896	0.0126	0.288	0.0140625	0.321429	22.8571
4.2	-1.24277	0.882	0.0124	0.288	0.014059	0.326531	23.2258
4.2	-1.2302	0.877	0.0124	0.287	0.0141391	0.327252	23.1452
4.2	-1.21759	0.867	0.0121	0.288	0.0139562	0.33218	23.8017
4.2	-1.20502	0.852	0.0119	0.287	0.0139671	0.336854	24.1176
4.2	-1.19241	0.848	0.0118	0.287	0.0139151	0.338443	24.322
4.2	-1.17984	0.845	0.0119	0.287	0.0140828	0.339645	24.1176
4.2	-1.16722	0.84	0.0118	0.287	0.0140476	0.341667	24.322
4.2	-1.15461	0.829	0.0116	0.287	0.0139928	0.3462	24.7414
4.2	-1.14204	0.817	0.0115	0.287	0.0140759	0.351285	24.9565
4.2	-1.12943	0.803	0.0113	0.286	0.0140722	0.356164	25.3097
4.2	-1.11686	0.791	0.0112	0.286	0.0141593	0.361568	25.5357
4.2	-1.10429	0.779	0.0109	0.285	0.0139923	0.365854	26.1468
4.2	-1.09168	0.779	0.0109	0.285	0.0139923	0.365854	26.1468
4.2	-1.07907	0.77	0.0108	0.285	0.014026	0.37013	26.3889
4.2	-1.06645	0.756	0.0106	0.285	0.0140212	0.376984	26.8868
4.2	-1.05389	0.758	0.0107	0.285	0.0141161	0.375989	26.6355
4.2	-1.04132	0.753	0.0106	0.285	0.014077	0.378486	26.8868
4.2	-1.0287	0.741	0.0104	0.284	0.0140351	0.383266	27.3077
4.2	-1.01614	0.733	0.0102	0.284	0.0139154	0.387449	27.8431
4.2	-1.00352	0.728	0.0101	0.284	0.0138736	0.39011	28.1188
4.2	-0.990955	0.725	0.0102	0.284	0.014069	0.391724	27.8431
4.2	-0.978341	0.716	0.00992	0.283	0.0138547	0.395251	28.5282
4.2	-0.965727	0.711	0.00993	0.283	0.0139662	0.398031	28.4995
4.2	-0.95316	0.709	0.0102	0.283	0.0143865	0.399154	27.7451
4.2	-0.940546	0.706	0.00974	0.283	0.013796	0.40085	29.0554
4.2	-0.927978	0.697	0.00987	0.283	0.0141607	0.406026	28.6727
4.2	-0.915365	0.692	0.00971	0.283	0.0140318	0.40896	29.1452
4.2	-0.902797	0.693	0.00977	0.282	0.0140981	0.406926	28.8639
4.2	-0.890183	0.683	0.00975	0.282	0.0142753	0.412884	28.9231
4.2	-0.877616	0.673	0.00942	0.281	0.013997	0.417533	29.8301
4.2	-0.865002	0.672	0.00962	0.282	0.0143155	0.419643	29.3139
4.2	-0.852434	0.671	0.00946	0.282	0.0140984	0.420268	29.8097
4.2	-0.839821	0.664	0.00945	0.281	0.0142319	0.423193	29.7354
4.2	-0.827253	0.66	0.0093	0.282	0.0140909	0.427273	30.3226
4.2	-0.814639	0.66	0.00933	0.282	0.0141364	0.427273	30.2251
4.2	-0.802071	0.654	0.00924	0.281	0.0141284	0.429664	30.4113
4.2	-0.789458	0.646	0.00917	0.28	0.014195	0.433437	30.5344
4.2	-0.776844	0.636	0.00892	0.28	0.0140252	0.440252	31.3901
4.2	-0.764277	0.632	0.00902	0.28	0.0142722	0.443038	31.0421
4.2	-0.751709	0.626	0.00902	0.28	0.0144089	0.447284	31.0421
4.2	-0.739095	0.624	0.00875	0.28	0.0140224	0.448718	32
4.2	-0.726482	0.622	0.00876	0.28	0.0140836	0.450161	31.9635
4.2	-0.713914	0.618	0.00879	0.279	0.0142233	0.451456	31.7406
4.2	-0.7013	0.614	0.00873	0.279	0.0142182	0.454397	31.9588
4.2	-0.688732	0.608	0.00863	0.279	0.0141941	0.458882	32.3291
4.2	-0.676119	0.603	0.00857	0.279	0.0142123	0.462687	32.5554
4.2	-0.663551	0.596	0.00863	0.278	0.0144799	0.466443	32.2132
4.2	-0.650937	0.593	0.00846	0.279	0.0142664	0.470489	32.9787
4.2	-0.63837	0.593	0.0083	0.279	0.0139966	0.470489	33.6145
4.2	-0.625756	0.591	0.00843	0.279	0.014264	0.472081	33.0961
4.2	-0.613143	0.588	0.00832	0.278	0.0141497	0.472789	33.4135
4.2	-0.600575	0.587	0.00826	0.278	0.0140716	0.473595	33.6562
4.2	-0.588007	0.582	0.00828	0.278	0.0142268	0.477663	33.5749
4.2	-0.575393	0.576	0.00825	0.278	0.0143229	0.482639	33.697
4.2	-0.562826	0.571	0.00826	0.278	0.0144658	0.486865	33.6562
4.2	-0.550212	0.565	0.00802	0.277	0.0141947	0.490265	34.5387
4.2	-0.537598	0.563	0.00802	0.278	0.0142451	0.493783	34.6633
4.2	-0.525031	0.56	0.00795	0.277	0.0141964	0.494643	34.8428
4.2	-0.512417	0.555	0.0079	0.277	0.0142342	0.499099	35.0633
4.2	-0.499849	0.556	0.00783	0.277	0.0140827	0.498201	35.3768
4.2	-0.487236	0.551	0.00784	0.277	0.0142287	0.502722	35.3316
4.2	-0.474668	0.548	0.00766	0.276	0.0139781	0.50365	36.0313
4.2	-0.462054	0.543	0.00767	0.276	0.0141252	0.508287	35.9844
4.2	-0.449441	0.536	0.00774	0.276	0.0144403	0.514925	35.6589
4.2	-0.436873	0.531	0.00763	0.276	0.0143691	0.519774	36.173
4.2	-0.424259	0.527	0.00754	0.276	0.0143074	0.523719	36.6048
4.2	-0.411692	0.524	0.00753	0.276	0.0143702	0.526718	36.6534
4.2	-0.399124	0.524	0.0075	0.277	0.014313	0.528626	36.9333
4.2	-0.38651	0.52	0.00742	0.276	0.0142692	0.530769	37.1968
4.2	-0.373897	0.514	0.0073	0.276	0.0142023	0.536965	37.8082
4.2	-0.361283	0.511	0.00729	0.275	0.0142661	0.53816	37.7229
4.2	-0.348715	0.508	0.00733	0.275	0.0144291	0.541339	37.5171
4.2	-0.336148	0.506	0.00712	0.275	0.0140711	0.543478	38.6236
4.2	-0.323534	0.499	0.00731	0.276	0.0146493	0.553106	37.7565
4.2	-0.310966	0.498	0.00709	0.276	0.0142369	0.554217	38.9281
4.2	-0.298353	0.495	0.0071	0.276	0.0143434	0.557576	38.8732
4.2	-0.285739	0.49	0.00711	0.275	0.0145102	0.561224	38.6779
4.2	-0.273171	0.486	0.00704	0.275	0.0144856	0.565844	39.0625
4.2	-0.260558	0.486	0.00697	0.276	0.0143416	0.567901	39.5983
4.2	-0.24799	0.488	0.0069	0.276	0.0141393	0.565574	40
4.2	-0.235376	0.487	0.00702	0.276	0.0144148	0.566735	39.3162
4.2	-0.222809	0.487	0.00696	0.276	0.0142916	0.566735	39.6552
[truncated: 16,813 more rows]
